# Supplementary material for: Signal acquisition and analysis of ambulatory electromyographic recordings for the assessment of sleep bruxism: A scoping review
Source: PubMed Central journal article supplement — J Oral Rehabil. 2021 May 2;48(7):846–71. doi: 10.1111/joor.13170 (PMC9292505; doi:10.1111/joor.13170), 2021-05-02

| General study information |              |      |                |                 |            |                                  |
|---------------------------|--------------|------|----------------|-----------------|------------|----------------------------------|
| #                         | First author | Year | Journal        | Study type      | Population | Description of recorder type     |
| 1                         | Abekura      | 2008 | Int J Prosth   | RCT             | adults     | portable EMG recorder            |
| 2                         | Ahlberg      | 2008 | J Oral Rehabil | case-control    | adults     | single-use disposable EMG-device |
| 3                         | Baad-Hansen  | 2007 | J Oral Rehabil | RCT             | adults     | portable EMG device              |
| 4                         | Baba         | 2005 | J Orofac Pain  | cross-sectional | adults     | portable EMG recording system    |

|   |                     |      |                  |                                         |          |                                                            |
|---|---------------------|------|------------------|-----------------------------------------|----------|------------------------------------------------------------|
| 5 | Čadová              | 2014 | Russ J Biomech   | algorithm development / cross-sectional | adults   | two-channel electromyography recorder                      |
| 6 | Camara-Souza        | 2018 | Clin Oral Invest | case-control                            | adults   | portable electromyography and electrocardiography device   |
| 7 | Carvalho Bortoletto | 2016 | J Phys Ther Sci  | RCT                                     | children | device for the evaluation of the electromyographic signals |
| 8 | Castro Mattia       | 2018 | Int J Prosth     | before-after interventional             | adults   | portable electromyographic device                          |
| 9 | Castroflorio        | 2014 | J Oral Rehabil   | diagnostic validity                     | adults   | portable EMG/ECG recorder                                  |

|    |              |      |                     |                             |        |                                                                                                                             |
|----|--------------|------|---------------------|-----------------------------|--------|-----------------------------------------------------------------------------------------------------------------------------|
|    |              |      |                     |                             |        | portable device allowing a simultaneous recording of EMG signals from both the masseter muscles as well as heart frequency. |
| 10 | Castroflorio | 2015 | J Oral Rehabil      | diagnostic validity         | adults |                                                                                                                             |
| 11 | Clark        | 1981 | Behav Res & Therapy | before-after interventional | adults | portable electromyographic recording device                                                                                 |
| 12 | Clarke       | 1984 | JOR (p 529-534)     | cross-sectional             | adults | microcomputer system                                                                                                        |
| 13 | Clarke       | 1984 | JOR (p 123-127)     | cross-sectional             | adults | microcomputer system                                                                                                        |

|    |           |      |                  |                     |        |                                                           |
|----|-----------|------|------------------|---------------------|--------|-----------------------------------------------------------|
| 14 | Conti     | 2014 | OSOMOPOR         | RCT                 | adults | portable single-channel EMG device                        |
| 15 | Deregibus | 2014 | Clin Oral Invest | reliability         | adults | portable device                                           |
| 16 | Gallo     | 1997 | J Sleep Res      | diagnostic validity | adults | microprocessor assisted portable one-channel EMG recorder |
| 17 | Gallo     | 1999 | JDR              | epidemiological     | adults | miniaturized solid-state portable recorder                |

|    |          |      |                |                                            |        |                                        |
|----|----------|------|----------------|--------------------------------------------|--------|----------------------------------------|
|    |          |      |                |                                            |        |                                        |
| 18 | Haketa   | 2003 | Int J Prosth   | device<br>development /<br>cross-sectional | adults | EMG recording system                   |
| 19 | Hammoudi | 2019 | J Dent         | cross-sectional                            | adults | portable single-<br>channel EMG device |
| 20 | Harada   | 2006 | J Oral Rehabil | RCT                                        | adults | portable EMG<br>recording unit         |

|    |         |      |                         |                                               |        |                                              |
|----|---------|------|-------------------------|-----------------------------------------------|--------|----------------------------------------------|
|    |         |      |                         |                                               |        |                                              |
| 21 | Ikeda   | 1996 | JOP                     | algorithm<br>development /<br>cross-sectional | adults | portable multichannel<br>analog tape recoder |
| 22 | Iwasaki | 2015 | Orthod<br>Craniofac Res | case-control                                  | adults | custom portable EMG<br>recorder              |
| 23 | Jadidi  | 2008 | JOR                     | RCT                                           | adults | portable EMG device                          |

|    |             |      |                       |              |        |                                                |
|----|-------------|------|-----------------------|--------------|--------|------------------------------------------------|
| 24 | Jadidi      | 2013 | Acta Odontol<br>Scand | RCT          | adults | portable EMG device                            |
| 25 | Jonggar     | 2015 | J Dent                | case-control | adults | portable single-<br>channel EMG device         |
| 26 | Karakoulaki | 2015 | Int J Prosth          | case-control | adults | miniature, disposable<br>single-use EMG device |

|    |          |      |                          |                                |        |                                       |
|----|----------|------|--------------------------|--------------------------------|--------|---------------------------------------|
|    |          |      |                          |                                |        |                                       |
| 27 | Kardachi | 1977 | J Periodontol            | before-after<br>interventional | adults | not described                         |
| 28 | Kato     | 2018 | Arch Oral Biol           | case-control                   | adults | recording hardware for<br>surface EMG |
| 29 | Khawaja  | 2015 | Orthod<br>Craniofac Res  | cross-sectional                | adults | portable EMG recorder                 |
| 30 | Lee      | 2010 | Am J Phys<br>Med Rehabil | RCT                            | adults | portable EMG device                   |



|    |            |      |                                   |                        |        |                                                        |
|----|------------|------|-----------------------------------|------------------------|--------|--------------------------------------------------------|
|    |            |      |                                   |                        |        | ultraminiature<br>wearable<br>electromyogram<br>system |
| 31 | Maeda      | 2019 | J Prosth Res                      | diagnostic<br>validity | adults |                                                        |
| 32 | Mainieri   | 2012 | OSOMOPO<br>R                      | diagnostic<br>validity | adults | portable surface EMG<br>device                         |
| 33 | Manfredini | 2011 | J Oral<br>Rehabil                 | cross-sectional        | adults | portable device                                        |
| 34 | Manfredini | 2016 | J Oral Facial<br>Pain<br>Headache | cross-sectional        | adults | portable device<br>combining EMG and<br>ECG recordings |

|    |            |      |                             |                             |        |                                      |
|----|------------|------|-----------------------------|-----------------------------|--------|--------------------------------------|
|    |            |      |                             |                             |        |                                      |
| 35 | Manfredini | 2018 | Progress in Orthodontics    | before-after interventional | adults | portable home EMG/ECG recorder       |
| 36 | Manfredini | 2019 | J Oral Facial Pain Headache | cross-sectional             | adults | portable device                      |
| 37 | Matsuda    | 2016 | Cranio                      | cross-sectional             | adults | ultraminiature electromyogram system |
| 38 | Matsumoto  | 2015 | JOR                         | RCT                         | adults | portable EMG recording unit          |

|    |           |      |              |                 |        |                                                     |
|----|-----------|------|--------------|-----------------|--------|-----------------------------------------------------|
|    |           |      |              |                 |        |                                                     |
| 39 | Minakuchi | 2012 | Sleep Breath | epidemiological | adults | small portable self-contained EMG detector/analyzer |
| 40 | Minakuchi | 2014 | J Prosth Res | case-control    | adults | wireless, all-in-one type portable EMG device       |
| 41 | Minakuchi | 2016 | Sleep Breath | cross-sectional | adults | EMG detector-containing device                      |
| 42 | Miyawaki  | 2003 | Sleep        | case-control    | adults | portable telemeter EMG recording system             |

|    |          |      |                                      |                 |        |                                            |
|----|----------|------|--------------------------------------|-----------------|--------|--------------------------------------------|
|    |          |      |                                      |                 |        |                                            |
| 43 | Miyawaki | 2004 | Am J Orthod<br>Dentofacial<br>Orthop | cross-sectional | adults | portable telemeter<br>EMG recording system |
| 44 | Mizumori | 2013 | Int J Prosth                         | cross-sectional | adults | portable EMG and ECG<br>telemetry system   |
| 45 | Mohamed  | 1997 | Cranio                               | RCT             | adults | portable EMG unit                          |
| 46 | Mude     | 2017 | J Prosth Res                         | case-control    | adults | portable EMG device                        |

|    |                         |      |                     |                                |          |                                                                  |
|----|-------------------------|------|---------------------|--------------------------------|----------|------------------------------------------------------------------|
| 47 | Murakami                | 2014 | J Stomat Occ<br>Med | cross-sectional                | adults   | portable EMG<br>recording unit                                   |
| 48 | Nagamatsu-<br>Sakaguchi | 2017 | Int J Prosth        | cross-sectional                | children | miniature single-use<br>electronic device                        |
| 49 | Needham                 | 2013 | BDJ                 | before-after<br>interventional | adults   | device for the<br>management of sleep<br>bruxism                 |
| 50 | Nitschke                | 2011 | Gerodontolog<br>y   | case-control                   | adults   | self-developed<br>miniaturised portable<br>one- channel recorder |

|    |          |      |                |                 |        |                                   |
|----|----------|------|----------------|-----------------|--------|-----------------------------------|
|    |          |      |                |                 |        |                                   |
| 51 | Ohlmann  | 2018 | J Dent         | case-control    | Adults | portable EMG and ECG recorder     |
| 52 | Ohlmann  | 2020 | J Clin Med     | cross-sectional | adults | portable EMG/ECG recorder         |
| 53 | Ono      | 2008 | Cranio         | case-control    | adults | portable surface EMG machine      |
| 54 | Palinkas | 2019 | Arch Ital Biol | case-control    | adults | portable electromyographic device |

|    |         |      |               |                                |        |                                                                    |
|----|---------|------|---------------|--------------------------------|--------|--------------------------------------------------------------------|
| 55 | Po      | 2013 | J Sleep Res   | cross-sectional                | adults | portable recorder                                                  |
| 56 | Raphael | 2013 | JOP           | before-after<br>interventional | adults | device that monitors<br>individually<br>biocalibrate EMG<br>events |
| 57 | Rugh    | 1981 | J Periodontol | before-after<br>interventional | adults | portable EMG<br>instrument                                         |

|    |                    |      |                                                      |                              |        |                                                              |
|----|--------------------|------|------------------------------------------------------|------------------------------|--------|--------------------------------------------------------------|
| 58 | Rugh               | 1984 | J Prosth Dent                                        | controlled<br>interventional | adults | portable<br>electromyographic<br>instruments                 |
| 59 | Rugh               | 1989 | J<br>Caraniomandi<br>b Disord<br>Facial Oral<br>Pain | controlled<br>interventional | adults | ambulatory recorder                                          |
| 60 | Saito-<br>Murakami | 2020 | J Oral Rehabil                                       | RCT                          | adults | hearing aid shaped one-<br>channel portable EMG<br>BF device |



|    |            |      |                                |                                                                      |        |                                                       |
|----|------------|------|--------------------------------|----------------------------------------------------------------------|--------|-------------------------------------------------------|
| 61 | Sakagami   | 2002 | Frontiers<br>Med Biol<br>Engng | device<br>development /<br>diagnostic<br>validity / case-<br>control | adults | portable bruxism<br>monitoring and<br>analysis device |
| 62 | Saueressig | 2010 | Int J Prosth                   | before-after<br>interventional                                       | adults | portable EMG device                                   |
| 63 | Schmitter  | 2015 | Sleep Med                      | case-control                                                         | adults | portable EMG device                                   |

|    |                 |      |                       |              |        |                                                       |
|----|-----------------|------|-----------------------|--------------|--------|-------------------------------------------------------|
| 64 | Shedden<br>Mora | 2012 | J<br>Psychosom<br>Res | case-control | adults | single-channel<br>ambulatory recording<br>devices     |
| 65 | Shedden<br>Mora | 2013 | Clin J Pain           | RCT          | adults | single-channel EMG<br>ambulatory recording<br>devices |
| 66 | Shimada         | 2019 | J Dent                | RCT          | adults | portable EMG device                                   |

|    |                       |      |                                                              |                                            |               |                                                                      |
|----|-----------------------|------|--------------------------------------------------------------|--------------------------------------------|---------------|----------------------------------------------------------------------|
| 67 | Shochat               | 2007 | Oral Surg<br>Oral Med<br>Oral Pathol<br>Oral Radiol<br>Endod | diagnostic<br>validity                     | adults        | disposable small<br>electronic<br>electromyographic-<br>based device |
| 68 | Stock                 | 1983 | Med & Biol<br>Eng &<br>Comput                                | device<br>development /<br>cross-sectional | not described | microprocessor to<br>monitor bruxing<br>activity                     |
| 69 | Stuginski-<br>Barbosa | 2015 | Sleep Breath                                                 | diagnostic<br>validity                     | adults        | single-channel EMG                                                   |

|    |          |      |                  |                 |        |                                           |
|----|----------|------|------------------|-----------------|--------|-------------------------------------------|
| 70 | Suganuma | 2007 | J Prosth Dent    | case-control    | adults | portable surface EMG machine              |
| 71 | Takaoka  | 2017 | Clin Oral Invest | cross-sectional | adults | portable automatic sleep bruxism analyzer |
| 72 | Thymi    | 2019 | J Dent           | cross-sectional | adults | ambulatory single-channel EMG-recorder    |

|    |         |      |                |                    |        |                                       |
|----|---------|------|----------------|--------------------|--------|---------------------------------------|
| 73 | Thymi   | 2020 | BDJ Open       | prospective cohort | adults | ambulatory, single-channel EMG device |
| 74 | Wei     | 2017 | J Oral Rehabil | case-control       | adults | portable EMG recorder                 |
| 75 | Yachida | 2012 | JDR            | case-control       | adults | portable single-channel EMG device    |

|    |           |      |                      |                                        |        |                                                               |
|----|-----------|------|----------------------|----------------------------------------|--------|---------------------------------------------------------------|
|    |           |      |                      |                                        |        |                                                               |
| 76 | Yamaguchi | 2012 | J Oral Rehabil       | cross-sectional                        | adults | ultraminiature cordless<br>masseter EMG<br>measurement system |
| 77 | Yamaguchi | 2018 | J Prosthodont<br>Res | device<br>development /<br>case report | adult  | data-logger-type<br>ultraminiature EMG<br>system              |
| 78 | Zhou      | 2016 | Int J Oral Sci       | before-after<br>interventional         | adults | portable EMG recorder                                         |

## Hardware

| Name or description of EMG device                                                                                                                                                          | Electrode type                                                                       | Wireless electrode | Number of channels               | Muscles                   |
|--------------------------------------------------------------------------------------------------------------------------------------------------------------------------------------------|--------------------------------------------------------------------------------------|--------------------|----------------------------------|---------------------------|
| Muscle Tester ME3000P, Mega Electronics                                                                                                                                                    | Bipolar silver-silver chloride (Blue sensor, type-N-00S, Medicotest Herlev, Denmark) | no                 | 3 (masseter, temporalis, ground) | temporalis and masseter L |
| BiteStrip (Scientific Laboratory Products Ltd., Tel Aviv, Israel)                                                                                                                          | not described                                                                        | yes                | 1 (masseter)                     | masseter                  |
| no commercial name given (Medotech, Aarhus, Denmark)                                                                                                                                       | Surface Ag/ AgCl electrodes with a diameter of 2.25 cm & electrode gel               | no                 | 2 (purpose not specified)        | masseter                  |
| portable EMG amplifier (6R21-KF, NEC Medical Systems), PCMCIA card-type analogue-to-digital (A/D) converter (NR-1000, KEYENCE), laptop PC (FMV-BIBLO NC313, Fujitsu), and external battery | not described                                                                        | no                 |                                  | 1 masseter R              |

|                                                                                                                                                                 |                                                                                                                                              |     |                                                     |                   |
|-----------------------------------------------------------------------------------------------------------------------------------------------------------------|----------------------------------------------------------------------------------------------------------------------------------------------|-----|-----------------------------------------------------|-------------------|
| portable wo-channel recorder developed at the Center of Dental Medicine of the University of Zürich (Zentrum für Zahnmedizin, ZZM, CH-8032 Zürich, Switzerland) | self-adhesive pre-gelled disposable Ag-AgCl rectangular surface electrodes (20×15 mm, type 9013S0212, Alpine Biomed ApS, Skovlunde, Denmark) | no  | 2 (masseter and reference)                          | masseter          |
| Bruxoff (Spes Medica, Battipaglia, Italy)                                                                                                                       | not described                                                                                                                                | no  | 3 (2 for bilateral masseter, 1 for heart frequency) | masseter L & R    |
| BiteStrip                                                                                                                                                       | not described                                                                                                                                | yes |                                                     | temporalis<br>1 L |
| BiteStrip (Scientific Laboratory Products)                                                                                                                      | not described                                                                                                                                | yes |                                                     | 1 masseter L      |
| Bruxoff (Spes Medica, Battipaglia, Italy)                                                                                                                       | disposable bipolar concentric electrodes (Code; Spes Medica, Battipaglia, Italy) with a 16 mm radius and an AgCl detection site              | no  | 3 (2 for bilateral masseter, 1 for heart frequency) | masseter L & R    |



|                                            |                                                                                                            |                             |                                                          |                           |
|--------------------------------------------|------------------------------------------------------------------------------------------------------------|-----------------------------|----------------------------------------------------------|---------------------------|
| Bruxoff (OT Bioelettronica, Torino, Italy) | disposable bipolar AgCl concentric electrodes (Code; Spes Medica, Battipaglia, Italy), with a 16 mm radius | no                          | 3 (2 for bilateral masseter, 1 for heart frequency)      | masseter & temporalis L&R |
| not described                              | not described                                                                                              | not described               | not described                                            | masseter                  |
| refers to other publication                | refers to other publication                                                                                | refers to other publication | 3 (2 for masseter and temporalis, 1 reference upon neck) | masseter & temporalis     |
| refers to other publication                | refers to other publication                                                                                | refers to other publication | 3 (2 for masseter and temporalis, 1 reference upon neck) | masseter & temporalis     |

|                                                                                                                                                                       |                                                                                                                                                |               |                                                     |                                                   |
|-----------------------------------------------------------------------------------------------------------------------------------------------------------------------|------------------------------------------------------------------------------------------------------------------------------------------------|---------------|-----------------------------------------------------|---------------------------------------------------|
| Grindcare (Medotech A/S, Herlev, Denmark)                                                                                                                             | single-electrode assembly, with 3 electrode contacts, attached to the skin with adhesive pad                                                   | no            |                                                     | 1 temporalis                                      |
| Bruxoff (Spes Medica, Battipaglia, Italy)                                                                                                                             | disposable bipolar concentric electrodes (Code®, Spes Medica, Battipaglia, Italy), with a radius of 16 mm and with detection site made of AgCl | no            | 3 (2 for bilateral masseter, 1 for heart frequency) | masseter L & R                                    |
| analog signal processing and amplification (5-70 x) circuitry, 8 bit single chip processor with 2 kB program memory and 64 kB RAM, contained in a 95 x 58 x 25 mm box | not described                                                                                                                                  | not described |                                                     | 1 masseter R                                      |
| refers to other publication                                                                                                                                           | adhesive AgCl surface electrodes (type 13L20, Dantec A/S, DK-2740 Skovlunde, Denmark) were                                                     | no            | 2 (masseter and reference)                          | masseter contralateral to preferred sleeping side |

|                                                                                                                                                                                            |                                                                                                                                                                                  |    |                                        |              |
|--------------------------------------------------------------------------------------------------------------------------------------------------------------------------------------------|----------------------------------------------------------------------------------------------------------------------------------------------------------------------------------|----|----------------------------------------|--------------|
| portable EMG amplifier (6R21-KF, NEC Medical Systems), PCMCIA card-type analogue-to-digital (A/D) converter (NR-1000, KEYENCE), laptop PC (FMV-BIBLO NC313, Fujitsu), and external battery | disposable bipolar electrodes with an interelec- trode distance of 15 mm (Biorode X, NEC Medical Systems), secured with surgical tape and after scrubbing with isopropyl alcohol | no | 2 (masseter & indifferent on forehead) | masseter R   |
| GrindCare Measure3 (Medotech A/S, Herlve, Denmark)                                                                                                                                         | not described                                                                                                                                                                    | no |                                        | 1 temporalis |
| Muscle Tester ME3000P, Mega Electronics, Kuopio, Finland                                                                                                                                   | disposable Ag/AgCl surface electrodes (Blue sensor; Medicotest, Ølstykke, Denmark)                                                                                               | no |                                        | 1 masseter R |

|                                                                                                     |                                                                                            |     |                                    |                      |
|-----------------------------------------------------------------------------------------------------|--------------------------------------------------------------------------------------------|-----|------------------------------------|----------------------|
| TEAC HR-10J cassette data recorder                                                                  | miniature bipolar surface electrodes                                                       | no  | 3 (masseter, respiratory, cardiac) | masseter             |
| custom device, only brand of amplifier mentioned (DISA 15C 01; Disa Elektronik, Skovlunde, Denmark) | adherent pre-gelled disposable surface EMG electrodes (Alpine Biomed, Tonsbakken, Denmark) | no  | 3 (masseter, temporalis, ground)   | masseter, temporalis |
| Grindcare (Medotech, Aarhus, Denmark)                                                               | 10-mm electrodes integrated in head band                                                   | yes | 1 (temporalis)                     | temporalis           |

|                                                          |                                       |     |                |            |
|----------------------------------------------------------|---------------------------------------|-----|----------------|------------|
| Grindcare version 2<br>(Medotech, DK)                    | electrodes integrated<br>in head band | yes | 2 (temporalis) | temporalis |
| GrindCare Measure                                        | not described                         | no  | 1              | temporalis |
| BiteStrip (Scientific<br>Laboratory Products,<br>Israel) | not described                         | yes | 1              | masseter   |

|                                                                                                                                                                                                                                                                        |                                                                                                                                                            |    |                                                          |                           |
|------------------------------------------------------------------------------------------------------------------------------------------------------------------------------------------------------------------------------------------------------------------------|------------------------------------------------------------------------------------------------------------------------------------------------------------|----|----------------------------------------------------------|---------------------------|
| refers to other publication                                                                                                                                                                                                                                            | 12 mm fluid-column Ag-AgCl E.C.G. electrodes                                                                                                               | no | 3 (2 for masseter and temporalis, 1 reference upon neck) | masseter & temporalis     |
| analogue signal processing and differential amplification integrated hybrid circuit (NB-6201HS; Nabtesco Co., Kobe, Japan), which included a 10 Hz high-pass filter and 1000 Hz low-pass filter, and a two-channel digital recorder (ICR- PS004 M; Sanyo Electric Co., | disposable silver/silver chloride surface electrodes (6×15 mm, Vitrode F-150S; Nihon Kohden Corp., Tokyo, Japan) with a center-to-center distance of 15 mm | no |                                                          | 1 masseter L              |
| not described                                                                                                                                                                                                                                                          | surface electrodes with adhesive tape                                                                                                                      | no | 2 (masseter & temporalis)                                | masseter & temporalis     |
| Myomonitor EMG system (Delsys Inc, Boston, MA)                                                                                                                                                                                                                         | not described                                                                                                                                              | no | 4 (2 for bilateral masseter, 2 for bilateral temporalis) | masseter & temporalis L&R |

|                                                             |                                                                                                                                  |     |                                                          |                           |
|-------------------------------------------------------------|----------------------------------------------------------------------------------------------------------------------------------|-----|----------------------------------------------------------|---------------------------|
| FLA-500-SD (FLA, Furusawa Lab Appliance Co, Kawagoe, Japan) | reference electrode of the same size as that of the electrodes positioned at the middle position of the two measuring electrodes | yes |                                                          | 1 masseter                |
| BiteStrip                                                   | not described                                                                                                                    | yes |                                                          | 1 masseter L              |
| BTS PocketEMG (BTS Bioengineering, Milan, Italy)            | bipolar surface electrodes (Duotrode; Myotronics Inc., Seattle, WA, USA)                                                         | no  | 4 (2 for bilateral masseter, 2 for bilateral temporalis) | masseter & temporalis L&R |
| Bruxoff (OT Bioelettronica)                                 | refers to other publication                                                                                                      | no  | 3 (2 for bilateral masseter, 1 for heart frequency)      | masseter L & R            |

|                                                              |                                                                                                                                    |     |                                                     |                |
|--------------------------------------------------------------|------------------------------------------------------------------------------------------------------------------------------------|-----|-----------------------------------------------------|----------------|
| Bruxoff (OT Bioelettronica, Torino, Italy)                   | refers to other publication                                                                                                        | no  | 3 (2 for bilateral masseter, 1 for heart frequency) | masseter L & R |
| Bruxoff (OT Bioelettronica)                                  | refers to other publication                                                                                                        | no  | 3 (2 for bilateral masseter, 1 for heart frequency) | masseter L & R |
| BMS (Harada Electronics Industry Ltd, Sapporo, Japan)        | Bipolar 12-mm diameter disposable surface electrodes with adhesive gel pads (Harada Electronics Industry Ltd, Sapporo, Japan) were | yes |                                                     | 1 masseter R   |
| Pro-Comp INFINITI (Thought Technology, Montreal, QC, Canada) | disposable Ag/AgCl surface electrodes (T3402M – Triode)                                                                            | no  | 2 (masseter, cardiac)                               | masseter       |



|                                                                        |                                                                                                     |     |  |                                                                                                          |
|------------------------------------------------------------------------|-----------------------------------------------------------------------------------------------------|-----|--|----------------------------------------------------------------------------------------------------------|
| BiteStrip (S.L.P. Ltd, Israel)                                         | not described                                                                                       | yes |  | 1 masseter L                                                                                             |
| BiteStrip (Up2dent, Germany)                                           | not described                                                                                       | yes |  | 1 masseter                                                                                               |
| BiteStrip (Up2dent, Germany)                                           | not described                                                                                       | yes |  | 1 masseter                                                                                               |
| PC Card Recorder DR-C2 (TEAC Instruments Corporation, Kawasaki, Japan) | disposable bipolar surface electrodes (12-mm diameter, blue sensor N-00-S, GE Market, Tokyo, Japan) | no  |  | temporalis, on te side opposite to that on which contact with the pillow was more frequent<br>1 frequent |

|                                                                                                                                                                                                   |                                                                                                                                                                                                                   |    |                       |                                     |
|---------------------------------------------------------------------------------------------------------------------------------------------------------------------------------------------------|-------------------------------------------------------------------------------------------------------------------------------------------------------------------------------------------------------------------|----|-----------------------|-------------------------------------|
| PC Card Recorder DR-C2 (TEAC Instruments Corporation, Kawasaki, Japan)                                                                                                                            | disposable bipolar surface electrodes (12-mm diameter)                                                                                                                                                            | no |                       | 1 temporalis                        |
| EMG-ECG Telemeter 00 (Harada Electronic Industry, Sapporo, Japan)                                                                                                                                 | Disposable electrodes (Vitrode F, Nihon Kohden)                                                                                                                                                                   | no | 2 (masseter, cardiac) | masseter                            |
| AL-200 EMG integrator                                                                                                                                                                             | The bipolar and gold-coated brass electrodes were circular (diameter of 5 mm), and the interelectrode distance was kept constant at 20 mm (center-to-center) by means of an epoxy casing which also contained the | no |                       | masseter side not used for sleeping |
| Analog signal processing and differential amplification integrated hybrid circuit (NB-6201HS; Nabtesco Co., Kobe, Japan), including an analogue high-pass filter (10 Hz) and an analogue low-pass | disposable Ag/AgCl differential surface electrodes (Vitrode F-150S; Nihon Kohden Corp., Tokyo, Japan) whose size was modified to be 6x15 mm before use, with center-to-center distances of 15 mm.                 | no |                       | 1 masseter L                        |

|                                           |                                                           |                             |   |            |
|-------------------------------------------|-----------------------------------------------------------|-----------------------------|---|------------|
| Moomin-Kei<br>(Sleepwell, Osaka,<br>Japan | disposable Ag/AgCl<br>surface electrode                   | no                          | 1 | masseter   |
| BiteStrip (SLP)                           | not described                                             | yes                         | 1 | masseter   |
| Grindcare (Medotech)                      | 3 electrodes attached<br>to the skin with<br>adhesive pad | no                          | 1 | temporalis |
| refers to other<br>publication            | refers to other<br>publication                            | refers to other publication | 1 | masseter   |

|                                                                     |               |               |                                                     |                |
|---------------------------------------------------------------------|---------------|---------------|-----------------------------------------------------|----------------|
| Bruxoff                                                             | not described | not described | 3 (2 for bilateral masseter, 1 for heart frequency) | masseter L & R |
| Bruxoff (Alder, Moncalieri (To), Italy)                             | not described | not described | not described                                       | not described  |
| EMG-021/025, KTR-2302B (Harada Electronic Industry, Sapporo, Japan) | not described | no            | 2 (bilateral masseter)                              | masseter L & R |
| BiteStrip (Scientific Laboratory Products)                          | not described | yes           |                                                     | 1 masseter L   |

|                                                                                                                                                                 |                                                                                             |               |                            |                                                                          |
|-----------------------------------------------------------------------------------------------------------------------------------------------------------------|---------------------------------------------------------------------------------------------|---------------|----------------------------|--------------------------------------------------------------------------|
| BSR release 2 (Zurich, Switzerland)                                                                                                                             | surface EMG electrodes (model 9013S0212; Alpine Biomed ApS, Skovlunde, Denmark; 20 9 15 mm) | no            | 2 (masseter and reference) | masseter muscle of the self-reported preferred chewing side, otherwise R |
| Grindcare (Medotech, Herlev, Denmark)                                                                                                                           | not described, but picture provided                                                         | no            |                            | 1 temporalis                                                             |
| portable EMG instrument (BF-100, Self-Control Systems, San Diego, CA) and battery operated chart recorder (Model 142, Linear Instruments Corporation, Reno, NV) | not described                                                                               | not described | not described              | masseter, side where fatigue was reported                                |

|                             |                                                  |    |              |                                                |
|-----------------------------|--------------------------------------------------|----|--------------|------------------------------------------------|
| refers to other publication | 3 mm diameter gold electrodes                    | no | 1 (masseter) | masseter R                                     |
| refers to other publication | 10 mm silver/silver/chloride recessed electrodes | no | 1 (masseter) | masseter                                       |
| DL-3 (Vega systems)         | not described                                    | no |              | temporalis on habitual mastication<br>1 n site |

|                                               |                                                             |     |                             |                     |
|-----------------------------------------------|-------------------------------------------------------------|-----|-----------------------------|---------------------|
| Morita MFG                                    | disposal electrodes<br>(Duotrode®,<br>Myotronics Inc., USA) | no  | 2 (bilateral<br>temporalis) | temporalis<br>L & R |
| BiteStrip (Scientific<br>Laboratory Products) | not described                                               | yes |                             | 1 masseter          |
| Grindcare (Medotech,<br>Herlev, Denmark)      | not described                                               | no  |                             | 1 temporalis        |

|                                                                                                 |                                                                                                                                                  |                                    |                                    |                                                                  |
|-------------------------------------------------------------------------------------------------|--------------------------------------------------------------------------------------------------------------------------------------------------|------------------------------------|------------------------------------|------------------------------------------------------------------|
| <p>basic PTA device with Loguva Brux™ Software (Haynl Elektronik GmbH, Schönebeck, Germany)</p> | <p>disposable silver-silver-chloride electrodes with standard 2 cm spacing (T3402 Triodes, Thought Technology Ltd, Montreal, Quebec, Canada)</p> | <p>no</p>                          | <p>1</p>                           | <p>masseter (L-R in predefined order)</p>                        |
| <p>Loguva Brux (Haynl Elektronik GmbH, Schönebeck, Germany)</p>                                 | <p>not described, but refers to publication with description</p>                                                                                 | <p>refers to other publication</p> | <p>refers to other publication</p> | <p>not described, but refers to publication with description</p> |
| <p>GC4-DL Prototype device (Sunstar Suisse SA)</p>                                              | <p>single-electrode assembly with three electrode contacts.</p>                                                                                  | <p>no</p>                          | <p>1</p>                           | <p>temporalis</p>                                                |



|                                                                    |                                                        |     |  |                                                          |                                                          |
|--------------------------------------------------------------------|--------------------------------------------------------|-----|--|----------------------------------------------------------|----------------------------------------------------------|
| BiteStrip (Scientific Laboratory Products, Ltd., Tel Aviv, Israel) | 2 electromyographic electrodes                         | yes |  | 1                                                        | masseter L & R                                           |
| no commercial name given, thorough description of components       | Silver e.e.g, electrodes filled with conducting paste  | no  |  | 3 (2 for masseter and temporalis, 1 reference upon neck) | masseter & temporalis, side of least contact with pollow |
| GrindCare (Medotech A/S, Herlev, Denmark)                          | single-channel assembly, with three electrode contacts | no  |  | 1                                                        | temporalis                                               |

|                                                                                 |               |    |                        |                |
|---------------------------------------------------------------------------------|---------------|----|------------------------|----------------|
| EMG-021/025, KTR-2302B (Harada Electronic Industry, Sapporo, Japan)             | not described | no | 2 (bilateral masseter) | masseter L & R |
| Grindcare 3.0 (Medotech, A/S)                                                   | not described | no |                        | 1 temporalis   |
| Grindcare®, version 4-DL (Delta Danish Electronics, Light & Acoustics, Denmark) | not described | no |                        | 1 temporalis   |

|                                                                                              |                                                                                             |    |   |              |
|----------------------------------------------------------------------------------------------|---------------------------------------------------------------------------------------------|----|---|--------------|
| GrindCare, version 3 + DL (Delta Danish Electronics, Light and Acoustics, Hørsholm, Denmark) | not described                                                                               | no | 1 | temporalis R |
| refers to other publication                                                                  | adherent pre- gelled disposable surface EMG electrodes (Alpine Biomed, Tonsbakken, Denmark) | no | 1 | temporalis R |
| Grindcare 3 (Medotech, Herlev, Denmark)                                                      | single-electrode assembly, with 3 electrode contacts                                        | no | 1 | temporalis   |

|                                                                                 |                                                            |     |  |                              |
|---------------------------------------------------------------------------------|------------------------------------------------------------|-----|--|------------------------------|
| BMS TEL-EMG recorder<br>(Harada Electronic<br>Industry Ltd., Sapporo,<br>Japan) | 12-mm-diameter<br>bipolar electrodes,                      | no  |  | 2<br>masseter &<br>reference |
| FLA-500-SD (Furusawa<br>Lab<br>Appliance Co., Japan)                            | bipolar measuring<br>electrodes                            | yes |  | 1<br>masseter R              |
| Grindcare 3<br>(Medotech, Herlev,<br>Denmark)                                   | single-electrode<br>assembly, with 3<br>electrode contacts | no  |  | 1<br>temporalis              |

| Picture of device | Use of additional instrumental methods to assess bruxism | Number of nights (not including the adaptation night)            | Adaptation night before scoring | Setting       | Participant instructions device and electrode handling |
|-------------------|----------------------------------------------------------|------------------------------------------------------------------|---------------------------------|---------------|--------------------------------------------------------|
| yes               | no                                                       | 3 x 1 according to interventional protocol                       | no                              | not described | not described                                          |
| no                | no                                                       |                                                                  | 1 not described                 | home          | not described                                          |
| no                | no                                                       | 4w in a period of 7-8 weeks according to interventional protocol | yes                             | home          | not described                                          |
| no                | no                                                       |                                                                  | 5 yes                           | home          | handling device and placement of electrodes            |

|     |                                                                             |                                            |                 |               |                                                                                                                                                 |
|-----|-----------------------------------------------------------------------------|--------------------------------------------|-----------------|---------------|-------------------------------------------------------------------------------------------------------------------------------------------------|
| no  | no                                                                          |                                            | 3 not described | not described | not described                                                                                                                                   |
| no  | electrocardiographic activity                                               |                                            | 1 yes           | home          | clear and detailed explanation regarding the device, according to the manufacturer guide                                                        |
| no  | no                                                                          | 2 x 1 according to interventional protocol | no              | not described | the caregiver was instructed on the location of the left temporal muscle and how to use the device according to the manufacturer's instructions |
| no  | no                                                                          | 2 x 1 according to interventional protocol | no              | home          | not described                                                                                                                                   |
| yes | electrocardiographic activity and polysomnography (for validation purposes) |                                            | 1 yes           | home          | not described                                                                                                                                   |

|    |    |                                                     |       |               |                                                                                                                                                                                                                                                                          |
|----|----|-----------------------------------------------------|-------|---------------|--------------------------------------------------------------------------------------------------------------------------------------------------------------------------------------------------------------------------------------------------------------------------|
| no | no |                                                     | 1 yes | home          | not described                                                                                                                                                                                                                                                            |
| no | no | 10-12 and 7-14 according to interventional protocol | no    | home          | Each subject was issued an EMG device, all the necessary equipment and instructed in the use of the device. The procedure of applying the electrodes was repeated several times by the patient under supervision to insure correct repeatable placement over the muscle. |
| no | no |                                                     | 10 no | not described | not described                                                                                                                                                                                                                                                            |
| no | no |                                                     | 7 no  | not described | not described                                                                                                                                                                                                                                                            |

|     |                                           |                                                 |      |               |                                                                                                                                                |
|-----|-------------------------------------------|-------------------------------------------------|------|---------------|------------------------------------------------------------------------------------------------------------------------------------------------|
| no  | no                                        | 5 + 10 + 5 according to interventional protocol | no   | home          | not described                                                                                                                                  |
| yes | electrocardiographic activity             | 3 nights in 3 weeks                             | no   | home          | training in use of device and electrode placement, written instructions and a night-time telephone number to call in the event of difficulties |
| no  | polysomnography (for validation purposes) |                                                 | 1 no | not described | not described                                                                                                                                  |
| no  | no                                        |                                                 | 7 no | home          | not applicable                                                                                                                                 |



|     |    |                                                    |       |      |                                                                                                                                                                                                                                                                                                                                                                                                |
|-----|----|----------------------------------------------------|-------|------|------------------------------------------------------------------------------------------------------------------------------------------------------------------------------------------------------------------------------------------------------------------------------------------------------------------------------------------------------------------------------------------------|
| yes | no |                                                    | 5 yes | home | 1 hour of instruction on how to set the EMG electrodes and operate the system                                                                                                                                                                                                                                                                                                                  |
| no  | no |                                                    | 4 no  | home | participants were instructed and carefully taught to use the device                                                                                                                                                                                                                                                                                                                            |
| no  | no | 10 x 3 nights according to interventional protocol | no    | home | The subjects were instructed to place electrodes in the same sites with the same manner using an instruction brochure in which the step-by-step procedure was visually indicated. During the habituation period for three nights, the photographs were taken with an instant camera after the placement of electrodes. The EMG recording was commenced after the subject's skill for electrode |

|     |                               |                                                                             |               |      |                                                                                                                                                                                                                            |
|-----|-------------------------------|-----------------------------------------------------------------------------|---------------|------|----------------------------------------------------------------------------------------------------------------------------------------------------------------------------------------------------------------------------|
| no  | electrocardiographic activity |                                                                             | 4 no          | home | not described                                                                                                                                                                                                              |
| yes | no                            |                                                                             | 3 no          | home | trained in how to use the portable recording equipment, how to start and stop the recorder, to remove the data storage chip at the end of a recording period and replace with a new one to begin the next recording period |
| yes | no                            | at least 5 nights per week for 11 weeks, according to intervention protocol | not described | home | All patients received comprehensive training in the use of the device                                                                                                                                                      |

|    |    |                                                                              |               |      |                                                                                              |
|----|----|------------------------------------------------------------------------------|---------------|------|----------------------------------------------------------------------------------------------|
| no | no | at least 5 nighths per week for 11 weeks, according to intervention protocol | not described | home | All patients received in-depth instruction in how to operate the device and manage the data. |
| no | no |                                                                              | 4 no          | home | carefully taught how to manage the device & written instruction                              |
| no | no |                                                                              | 1 no          | home | written instructions                                                                         |

|                             |    |   |               |               |                                                               |
|-----------------------------|----|---|---------------|---------------|---------------------------------------------------------------|
| no                          | no | 7 | not described | not described | not described                                                 |
| refers to other publication | no | 1 | no            | home          | not applicable                                                |
| yes                         | no | 3 | no            | home          | trained to use portable EMG recorders and surface electrodes  |
| no                          | no | 3 | no            | home          | instructed and trained on the use of the portable EMG machine |

|     |                                                 |   |     |           |                                                                                                                                                                                               |
|-----|-------------------------------------------------|---|-----|-----------|-----------------------------------------------------------------------------------------------------------------------------------------------------------------------------------------------|
| yes | polysomnography<br>(for validation<br>pruposes) | 1 | yes | laboratoy | not described                                                                                                                                                                                 |
| no  | polysomnography<br>(for validation<br>pruposes) | 1 | yes | laboratoy | not described                                                                                                                                                                                 |
| no  | no                                              | 1 | no  | home      | All subjects received precise<br>instruc- tions on how to<br>handle the device (namely on<br>how to start the recording<br>session when going to bed and<br>how to stop it when waking<br>up) |
| no  | electrocardiographi<br>c activity               | 1 | yes | home      | not described                                                                                                                                                                                 |

|     |                               |                                                   |       |      |                                                                                                                                                                                                                                                                                                                                                                                      |
|-----|-------------------------------|---------------------------------------------------|-------|------|--------------------------------------------------------------------------------------------------------------------------------------------------------------------------------------------------------------------------------------------------------------------------------------------------------------------------------------------------------------------------------------|
| no  | electrocardiographic activity | 2 x 2 according to interventional protocol        | no    | home | not described                                                                                                                                                                                                                                                                                                                                                                        |
| no  | no                            |                                                   | 1 yes | home | refers to other publication                                                                                                                                                                                                                                                                                                                                                          |
| yes | no                            |                                                   | 1 yes | home | not described                                                                                                                                                                                                                                                                                                                                                                        |
| no  | no                            | 6 x 2 nights according to interventional protocol | yes   | home | These procedures were performed by the subject after careful instruction by the same operator (H.M.). The subjects were instructed to place electrodes in the same sites in the same manner using an instruction brochure in which the step-by-step procedure was visually indicated. The recording was commenced after the subject's skill for electrode application was confirmed. |

|    |                        |   |     |      |                                                                                                                                    |
|----|------------------------|---|-----|------|------------------------------------------------------------------------------------------------------------------------------------|
| no | no                     | 6 | no  | home | explained the usage in their home environment by using a mirror and an instruction manual over 15 min by a pre-trained instructors |
| no | no                     | 3 | no  | home | instructed on its usage using a mirror and an instruction manual over 15 min by 2 pre-calibrated instructors                       |
| no | no                     | 3 | no  | home | individually instructed on the usage of device                                                                                     |
| no | audiovisual recordings | 1 | yes | home | not described                                                                                                                      |

|     |                                                            |                                            |               |      |                                                          |
|-----|------------------------------------------------------------|--------------------------------------------|---------------|------|----------------------------------------------------------|
| no  | audiovisual recordings                                     |                                            | 1 yes         | home | not described                                            |
| yes | electrocardiographic activity                              |                                            | 1 yes         | home | provided instructions on the use of the telemetry system |
| no  | no                                                         | 2 x 7 according to interventional protocol | not described | home | not described                                            |
| no  | audio recordings, to exclude events not related to bruxism |                                            | 1 yes         | home | not applicable                                           |



|     |    |               |               |               |                                                                                                                                 |
|-----|----|---------------|---------------|---------------|---------------------------------------------------------------------------------------------------------------------------------|
| no  | no | 1             | not described | not described | The subjects were instructed to place an electrode on the left or right masseter muscle before bedtime                          |
| no  | no | not described | not described | home          | instructed in its usage in a home environment using a mirror and an instruction manual over 15 minutes by 2 trained instructors |
| yes | no | 35            | no            | home          | thorough verbal and written guidance in the use of the device                                                                   |
| no  | no | 2             | no            | home          | not applicable                                                                                                                  |

|     |                                              |     |               |               |                                                                                                 |
|-----|----------------------------------------------|-----|---------------|---------------|-------------------------------------------------------------------------------------------------|
| no  | electrocardiographic activity                | > 5 | no            | home          | not described                                                                                   |
| no  | no                                           | 5   | not described | not described | not described                                                                                   |
| yes | no                                           | 1   | no            | home          | instructed in the use of this device until they were able to perform EMG measurements correctly |
| no  | Polysomnography (for selecting participants) | 3   | no            | not described | not described                                                                                   |

|     |    |    |     |      |                                                                                                                                                                |
|-----|----|----|-----|------|----------------------------------------------------------------------------------------------------------------------------------------------------------------|
|     |    |    |     |      |                                                                                                                                                                |
| no  | no | 1  | yes | home | not described                                                                                                                                                  |
| yes | no | 70 | no  | home | not described                                                                                                                                                  |
| no  | no | 10 | no  | home | Each subject was instructed in the use of a portable EMG instrument, a battery operated cart recorder and was asked to record unilateral masseter EMG activity |

|                             |                                                                            |                                                                |               |               |                                                                                    |
|-----------------------------|----------------------------------------------------------------------------|----------------------------------------------------------------|---------------|---------------|------------------------------------------------------------------------------------|
| no                          | no                                                                         | minimally 10 nights, exact number not described                | not described | home          | subjects were taught to apply the electrodes and record their nightly EMG readings |
| no                          | no                                                                         | 4 x 7-14 according to interventional protocol                  | not described | home          | each patient practiced electrode placement until correct placement was achieved    |
| refers to other publication | PSG-video recording to detect motion artefacts in 4 out of 20 participants | 1 + 2 + 1 during 3 weeks, according to interventional protocol | not described | not described | not described                                                                      |

|     |    |       |    |      |                                                                                                                                                                  |
|-----|----|-------|----|------|------------------------------------------------------------------------------------------------------------------------------------------------------------------|
| yes | no | 3     | no | home | They received brief instruction about how to use the device, and instructed to place the electrodes to the both sides of the temple over the temporalis muscles. |
| yes | no | 2 x 1 | no | home | not described                                                                                                                                                    |
| no  | no | 1     | no | home | I nstructed on how to use the device by means of a pictorial representation and a live demonstration                                                             |

|    |    |                                              |      |      |                                                           |
|----|----|----------------------------------------------|------|------|-----------------------------------------------------------|
| no | no |                                              | 3 no | home | instructed by the study investigators to use the devices  |
| no | no |                                              | 3 no | home | Participants were precisely instructed to use the devices |
| no | no | 2w + 2w according to interventional protocol | no   | home | not described                                             |

|    |                                                 |               |               |           |                                                                                           |
|----|-------------------------------------------------|---------------|---------------|-----------|-------------------------------------------------------------------------------------------|
| no | polysomnography<br>(for validation<br>pruposes) | 1             | no            | laboratoy | not described                                                                             |
| no | no                                              | not described | not described | home      | not described                                                                             |
| no | polysomnography<br>(for validation<br>pruposes) | 5             | no            | home      | All participants were properly<br>instructed and trained in the<br>use of the EMG device. |

|     |    |   |    |      |                                                                                                                                                       |
|-----|----|---|----|------|-------------------------------------------------------------------------------------------------------------------------------------------------------|
| yes | no | 1 | no | home | Subjects were shown how to use this device                                                                                                            |
| no  | no | 3 | no | home | An illustrated manual was enclosed to demonstrate proper measurement technique by the subjects.                                                       |
| no  | no | 4 | no | home | Participants received instruction and training by the examiner in the use of the GC, and written instructions were provided for consultation at home. |



|    |    |                     |      |      |                                                                                  |
|----|----|---------------------|------|------|----------------------------------------------------------------------------------|
|    |    |                     |      |      |                                                                                  |
| no | no | 3 x 3 within 1 year | no   | home | refers to other publication                                                      |
| no | no |                     | 3 no | home | trained to prepare skin,<br>position electrodes, operate<br>the device           |
| no | no |                     | 4 no | home | careful instruction and training<br>by the examiners in the use of<br>EMG device |

|     |                                                             |                                                  |      |           |                                                                                                                                                                                                                                                                                                                                                                                  |
|-----|-------------------------------------------------------------|--------------------------------------------------|------|-----------|----------------------------------------------------------------------------------------------------------------------------------------------------------------------------------------------------------------------------------------------------------------------------------------------------------------------------------------------------------------------------------|
| yes | polysomnography<br>(for validation<br>pruposes)             |                                                  | 1 no | laboratoy | not applicable                                                                                                                                                                                                                                                                                                                                                                   |
| yes | surface<br>electromyography<br>(for validation<br>pruposes) |                                                  | 1 no | home      | The skin surface is cleaned with alcohol gauze, and then the device is attached to the skin surface with dedicated double-sided adhesive tape. During nocturnal use, stronger fixation by adhesive tape over the body of device is recommended. If patients need some camouflage for daytime use, the device can be covered with gauze as if it is covering a wound on the face. |
| no  | no                                                          | 3 x 5 according to<br>interventional<br>protocol | no   | home      | not described                                                                                                                                                                                                                                                                                                                                                                    |

---

## Planning

|                                                                                                                                                                                                                                                                       |                     |
|-----------------------------------------------------------------------------------------------------------------------------------------------------------------------------------------------------------------------------------------------------------------------|---------------------|
| Participant instructions device set-up                                                                                                                                                                                                                                | Electrode placement |
| not described                                                                                                                                                                                                                                                         | not described       |
| not described                                                                                                                                                                                                                                                         | not described       |
| not described                                                                                                                                                                                                                                                         | not described       |
| At the beginning of each recording night, the subjects performed 3 brief (2 seconds' duration) maximum voluntary contractions (MVC) in maximum intercuspation. Upon waking in the morning, the subjects were asked to record additional information in a sleep diary. | participant         |

|                                                                                                                                                                                   |                      |
|-----------------------------------------------------------------------------------------------------------------------------------------------------------------------------------|----------------------|
| <p>In the beginning of each recording the subject performs a set of maximal contractions either in intercuspal position or better on a cotton roll</p>                            | <p>not described</p> |
| <p>Before sleep, participants activated the Bruxoff by performing three instances of maximum voluntary clenching (MVC), lasting 3 s each, with 10 s of rest between each MVC.</p> | <p>participant</p>   |
| <p>not described</p>                                                                                                                                                              | <p>caregiver</p>     |
| <p>not described</p>                                                                                                                                                              | <p>not described</p> |
| <p>subjects were asked to perform three maximum voluntary clenching (MVC) on teeth lasting 3 s each and separated by 10 s of rest</p>                                             | <p>not described</p> |

|                                                                                                                                                                                                                                                                                                                                                                                                                               |               |
|-------------------------------------------------------------------------------------------------------------------------------------------------------------------------------------------------------------------------------------------------------------------------------------------------------------------------------------------------------------------------------------------------------------------------------|---------------|
| <p>The recording procedure provided that five tapping movements before sleep and after getting up in the morning were performed, to easily recognise the beginning and the end of the recordings. After the five tapping movements at the beginning of the recording session, the subjects performed three maximum voluntary clenching (MVC) on teeth. The clenches should last 3 s each and be separated by a 10-s rest.</p> | not described |
| not described                                                                                                                                                                                                                                                                                                                                                                                                                 | participant   |
| not described                                                                                                                                                                                                                                                                                                                                                                                                                 | not described |
| not described                                                                                                                                                                                                                                                                                                                                                                                                                 | not described |

|                                                                                                                                                                                                                                                                                                                                                                                                                                                                                                                                                                                                                                     |                      |
|-------------------------------------------------------------------------------------------------------------------------------------------------------------------------------------------------------------------------------------------------------------------------------------------------------------------------------------------------------------------------------------------------------------------------------------------------------------------------------------------------------------------------------------------------------------------------------------------------------------------------------------|----------------------|
| <p>participants were requested to relax their jaw muscles for 10s, then to clench their teeth around 60% of the MVC for 10s</p>                                                                                                                                                                                                                                                                                                                                                                                                                                                                                                     | <p>not described</p> |
| <p>At the beginning of the recording, the subjects were asked to perform three maximum voluntary clenching (MVC) lasting 3 s each and separated by 10 s of rest.</p>                                                                                                                                                                                                                                                                                                                                                                                                                                                                | <p>participant</p>   |
| <p>not described</p>                                                                                                                                                                                                                                                                                                                                                                                                                                                                                                                                                                                                                | <p>not described</p> |
| <p>we connected the EMG recorder to a personal computer and recorded the EMG signal during a series of 6 maximum clenches. The subject clenched maximally for 3 sec and repeated the clench 5 times with 15-second intervals of rest... The recording protocol also included the registration of the maximum voluntary contraction force and several artifact situations that could disturb the EMG recording during sleep. These two registrations were performed just once, i.e., on the evening before the first recording night... the subject simulated 3X a sequence of situations that could occur during sleep and dis-</p> | <p>examiner</p>      |

|                                                                                                                                                  |                    |
|--------------------------------------------------------------------------------------------------------------------------------------------------|--------------------|
| <p>Immediately after commencement of the EMG recording, subjects were asked to clench their teeth at MVC</p>                                     | <p>participant</p> |
| <p>not described</p>                                                                                                                             | <p>participant</p> |
| <p>instructed to perform maximal clenching for 3 s at five times. They were also instructed to perform the maximal clenching when they awoke</p> | <p>participant</p> |

|                                                                                                                                                                                                                                                                                                                                                                                                                    |                      |
|--------------------------------------------------------------------------------------------------------------------------------------------------------------------------------------------------------------------------------------------------------------------------------------------------------------------------------------------------------------------------------------------------------------------|----------------------|
| <p>The 100% MVC for each subject was recorded at the beginning of each night using three brief (2-second) MVC efforts.</p>                                                                                                                                                                                                                                                                                         | <p>not described</p> |
| <p>not described</p>                                                                                                                                                                                                                                                                                                                                                                                               | <p>participant</p>   |
| <p>The patients were asked to clench their teeth as hard as possible for 2–5 s to establish the maximum voluntary contraction (MVC). Then the patients performed grimaces and swallowing movements for 2–5 s. Finally, the threshold value for the intensity of the electrical stimulus was adjusted. The patients performed the set-up procedure every night to record the personal parameters in the device.</p> | <p>participant</p>   |



|                                                                                                                                                                                                                       |                    |
|-----------------------------------------------------------------------------------------------------------------------------------------------------------------------------------------------------------------------|--------------------|
| <p>Patients were asked to clench their teeth as hard as possible for 2–5 s in order to establish the maximum voluntary contraction (MVC). Then the patients performed grimaces and swallowing movements for 2–5s.</p> | <p>participant</p> |
| <p>not described</p>                                                                                                                                                                                                  | <p>participant</p> |
| <p>Patients had to make four to five maximum voluntary clenches to assess the individual bruxing threshold</p>                                                                                                        | <p>participant</p> |

|                                                                                                                                                        |                          |
|--------------------------------------------------------------------------------------------------------------------------------------------------------|--------------------------|
| not described                                                                                                                                          | not described            |
| subjects were instructed to perform maximal voluntary clenching (MVC) three times for 2 s at intervals of 2 s                                          | investigator in hospital |
| not described                                                                                                                                          | participant              |
| The subjects were asked to clench as hard as they could, and the EMG activity was recorded for 3 secs. This clench procedure was repeated three times. | participant              |

|                                                                                                                                                                                                                                                              |                      |
|--------------------------------------------------------------------------------------------------------------------------------------------------------------------------------------------------------------------------------------------------------------|----------------------|
| <p>Before sleeping and after getting up, maximum voluntary contraction (MVC), tapping, grinding, maximum voluntary mouth- opening, swallowing, cough, and gum chewing on the free side, right side and left side were recorded as calibration movements.</p> | <p>not described</p> |
| <p>the patient was asked to clench down with maximum force on a wooden stick 3 times within a 20-second period</p>                                                                                                                                           | <p>not described</p> |
| <p>At the beginning of each recording session, the subjects performed three swallowing movements</p>                                                                                                                                                         | <p>examiner</p>      |
| <p>not described</p>                                                                                                                                                                                                                                         | <p>not described</p> |

|                                                                                                                    |                             |
|--------------------------------------------------------------------------------------------------------------------|-----------------------------|
|                                                                                                                    |                             |
| not described                                                                                                      | not described               |
| refers to other publication                                                                                        | refers to other publication |
| MVC and swallowing and tapping were recorded as calibration movements before sleeping on their back                | not described               |
| Subjects were instructed to perform maximal clenching for 3 s for three times after the commencement of recording. | participant                 |

|                                                                                                                                                                                                                                                                                                |               |
|------------------------------------------------------------------------------------------------------------------------------------------------------------------------------------------------------------------------------------------------------------------------------------------------|---------------|
| not described                                                                                                                                                                                                                                                                                  | participant   |
| not described                                                                                                                                                                                                                                                                                  | participant   |
| not described                                                                                                                                                                                                                                                                                  | participant   |
| baseline values recorded prior to sleeping in the supine position for the following measurements: maximum voluntary clenching of the teeth for 1 second, tooth tapping, coughing, lateral and vertical head movements, and sali- va swallowing. All of these activities were repeated 3 times. | not described |

|                                                                                                                                              |               |
|----------------------------------------------------------------------------------------------------------------------------------------------|---------------|
|                                                                                                                                              |               |
| not described                                                                                                                                | not described |
| not described                                                                                                                                | participant   |
| not described                                                                                                                                | participant   |
| each subject was instructed to perform maximum voluntary clenching for three times for 2 s at intervals of 2 s in the beginning of recording | examiner      |

|                                                                                                                                                                                                                                                                                                                                                           |                               |
|-----------------------------------------------------------------------------------------------------------------------------------------------------------------------------------------------------------------------------------------------------------------------------------------------------------------------------------------------------------|-------------------------------|
| <p>they were instructed to conduct maximal tooth clenching for 3 times for 3 s each before bedtime</p>                                                                                                                                                                                                                                                    | <p>participant</p>            |
| <p>not described</p>                                                                                                                                                                                                                                                                                                                                      | <p>participant</p>            |
| <p>not described</p>                                                                                                                                                                                                                                                                                                                                      | <p>participant</p>            |
| <p>the subject was asked to clench maximally 5- for 3 s with 15 s rest intervals on the force transducer placed ipsilaterally to the electrodes while recording the EMG signal. Then the force transducer was removed and subjects clenched again 5- in maximum intercuspa- tion. Finally, five clenches were repeated again on the force transducer.</p> | <p>investigator in clinic</p> |

|               |               |
|---------------|---------------|
|               |               |
| not described | not described |
|               |               |
| not described | not described |
|               |               |
| not described | participant   |
|               |               |
| not described | not described |



|                                                                                                                                                                                                           |                      |
|-----------------------------------------------------------------------------------------------------------------------------------------------------------------------------------------------------------|----------------------|
| <p>participants were asked to clench their teeth as hard as possible, three times for 2–3 s each, with 15-s pauses in between clenching efforts. These tasks were completed within a 6-min time-frame</p> | <p>not described</p> |
| <p>Setup of the threshold level is done every time the device is mounted before sleep (60%MVC)</p>                                                                                                        | <p>participant</p>   |
| <p>not described</p>                                                                                                                                                                                      | <p>participant</p>   |

|                                                                                                                                                                                                                   |               |
|-------------------------------------------------------------------------------------------------------------------------------------------------------------------------------------------------------------------|---------------|
| not described                                                                                                                                                                                                     | participant   |
| not described                                                                                                                                                                                                     | participant   |
| For calibrating EMG signal levels, a maximum voluntary contraction (100% MVC) lasting 3 seconds was repeated three times with a 30-seconds interval between the tasks at the beginning and end of each recording. | not described |

|                                                                                                    |               |
|----------------------------------------------------------------------------------------------------|---------------|
| not described                                                                                      | participant   |
| The patient clenched down with maximum force on a wood stick three times within a 20-second period | not described |
| biting with approximately 60% of maximum voluntary biting force.                                   | participant   |

|               |                             |
|---------------|-----------------------------|
| not described | participant                 |
| not described | refers to other publication |
| not described | participant                 |

|                                                                                                                                                                                                                                |                      |
|--------------------------------------------------------------------------------------------------------------------------------------------------------------------------------------------------------------------------------|----------------------|
| <p>the patient is instructed to perform 2 to 3 maximal voluntary clenches to determine the individual bruxing threshold (Fig.</p>                                                                                              | <p>not described</p> |
| <p>not described</p>                                                                                                                                                                                                           | <p>not described</p> |
| <p>To determine the individual contraction parameters, every night, participants were requested to relax their jaw muscles for 10 s, then to clench their teeth around 60 % of the maximum voluntary contraction for 10 s.</p> | <p>participant</p>   |

|                                                                                                                                                                                           |             |
|-------------------------------------------------------------------------------------------------------------------------------------------------------------------------------------------|-------------|
| not described                                                                                                                                                                             | participant |
| Subjects were asked to clench their teeth as hard as possible once for approximately 10 s every night before the recording to establish the personal maximum voluntary contraction (MVC). | participant |
| not described                                                                                                                                                                             | participant |

|                                                                                                                                                                                                                                            |                    |
|--------------------------------------------------------------------------------------------------------------------------------------------------------------------------------------------------------------------------------------------|--------------------|
| <p>Participants were required to perform three MVCs in the first 30 min of each recording in order to enable subsequent scoring of bruxism episodes. A sticker reminding participants of this necessity was placed on all EMG devices.</p> | <p>participant</p> |
| <p>not described</p>                                                                                                                                                                                                                       | <p>participant</p> |
| <p>Participants were asked to relax their jaw muscles for 10 sec. Then they made a grimace for 10 sec, then clenched their teeth around 60% of the maximum voluntary contraction for 10 sec. All participants received .</p>               | <p>participant</p> |

|                                                                                                                                                                                                                                  |               |
|----------------------------------------------------------------------------------------------------------------------------------------------------------------------------------------------------------------------------------|---------------|
| not described                                                                                                                                                                                                                    | examiner      |
| <p>Prior to recording data during the targeted period, recording data during some calibration movements such as maximum clenching, tapping, swallowing and coughing is performed</p>                                             | participant   |
| <p>patients were asked to relax their jaw-closing muscle for 10 s. Then, they clenched their teeth at maximal voluntary clenching (MVC) for 10 s, and 60% ofMVC was pre-set for the threshold of starting the EMG recording.</p> | not described |



|                                                                                                                                                                                                                                                                                                                                                                                                                       |                                        |
|-----------------------------------------------------------------------------------------------------------------------------------------------------------------------------------------------------------------------------------------------------------------------------------------------------------------------------------------------------------------------------------------------------------------------|----------------------------------------|
|                                                                                                                                                                                                                                                                                                                                                                                                                       |                                        |
| How are failures dealt with                                                                                                                                                                                                                                                                                                                                                                                           | Amplification factor                   |
| not described                                                                                                                                                                                                                                                                                                                                                                                                         | amplified signal, factor not described |
| not described                                                                                                                                                                                                                                                                                                                                                                                                         | not described                          |
| The EMG data were sent by e-mail to the research team every morning in order to further analyse and store the data and to eliminate possible problems with the device. All data were checked for problems and errors due to bad recordings. If a problem was found, the patient was contacted in order to solve the problem and ask them to add one night to the phase in order to get sufficient data in each phase. | amplified signal, factor not described |
| Every signal that was judged to be an artifact was excluded from the further analysis. Additional EMG measurements of unsuccessful recordings due to unacceptable noise levels.                                                                                                                                                                                                                                       | amplified signal, factor not described |

|               |                                        |
|---------------|----------------------------------------|
|               |                                        |
| not described | amplified signal, factor not described |
| not described | not described                          |
| not described | not described                          |
| not described | not described                          |
| not described | 4300x                                  |

|               |                             |
|---------------|-----------------------------|
| not described | 4300x                       |
| not described | not described               |
| not described | refers to other publication |
| not described | refers to other publication |

|                                                                                                                                                                                                                         |                             |
|-------------------------------------------------------------------------------------------------------------------------------------------------------------------------------------------------------------------------|-----------------------------|
| reduction of recording night and exclusion of participants from analysis                                                                                                                                                | not described               |
| not described                                                                                                                                                                                                           | 4300x                       |
| data around bad-impedance measurements were excluded from analysis                                                                                                                                                      | refers to other publication |
| Recordings during which either sleep had been severely disturbed by negative events or electrode disconnection had occurred were discarded. In such cases, the recording was repeated on an equivalent day of the week. | 3590x                       |

|                                                                                                                                                                                                         |                                               |
|---------------------------------------------------------------------------------------------------------------------------------------------------------------------------------------------------------|-----------------------------------------------|
| <p>additional instructions on electrode settings because of unsuccessful recordings caused by an unacceptable noise level of recorded EMG signals. Artifacts were manually cleaned from the signal.</p> | <p>amplified signal, factor not described</p> |
| <p>recordings were discarded ("error-free recordings were required")</p>                                                                                                                                | <p>not described</p>                          |
| <p>raw EMG data was carefully examined and the data related to the artifacts were excluded</p>                                                                                                          | <p>not described</p>                          |

|                                                                                                                                                                                                        |                                        |
|--------------------------------------------------------------------------------------------------------------------------------------------------------------------------------------------------------|----------------------------------------|
|                                                                                                                                                                                                        |                                        |
| not described                                                                                                                                                                                          | amplified signal, factor not described |
| not described                                                                                                                                                                                          | 5000x                                  |
| In case of poor connectivity between the electrode and skin during sleep, the EMG recordings with errors were identified and labelled by the software and that data was not used for further analysis. | not described                          |

|                                                                                                                                                |                                        |
|------------------------------------------------------------------------------------------------------------------------------------------------|----------------------------------------|
| Grimaces, swallowing and artifacts due to bad connections between the electrodes and the skin were intended not to be included in the analysis | not described                          |
| only error-free recordings used                                                                                                                | not described                          |
| repetition of procedure                                                                                                                        | amplified signal, factor not described |

|                                                                                                                                              |                                        |
|----------------------------------------------------------------------------------------------------------------------------------------------|----------------------------------------|
| subjects repeated the experiment because of mechanical difficulties with electrode retention and amplifiers problems during te first attempt | refers to other publication            |
| not described                                                                                                                                | refers to other publication            |
| noisy signals were identified and excluded                                                                                                   | 5000x                                  |
| If the electrodes became detached during the recording, EMG data were recorded for an additional night.                                      | amplified signal, factor not described |



|                        |                                        |
|------------------------|----------------------------------------|
| not described          | 250x                                   |
| not described          | not described                          |
| excluded from analysis | amplified signal, factor not described |
| not described          | refers to other publication            |

|                                                                                                                                                                                                                            |                             |
|----------------------------------------------------------------------------------------------------------------------------------------------------------------------------------------------------------------------------|-----------------------------|
|                                                                                                                                                                                                                            |                             |
| not described                                                                                                                                                                                                              | refers to other publication |
| not described                                                                                                                                                                                                              | refers to other publication |
| not described                                                                                                                                                                                                              | 500x                        |
| When technical problems were detected or reported, adequate instruction was provided and additional recordings were performed .... the second-night data were used when technical errors were detected in the first night. | not described               |

|               |                                        |
|---------------|----------------------------------------|
|               |                                        |
| not described | amplified signal, factor not described |
| not described | amplified signal, factor not described |
| not described | not described                          |
| not described | not described                          |

|                                                                                                                 |               |
|-----------------------------------------------------------------------------------------------------------------|---------------|
| not described                                                                                                   | not described |
| EMG activities with disturbed ECG signals were assumed to be body movements and were excluded from the analysis | not described |
| not described                                                                                                   | 2000 x        |
| recordings with high baseline noise were excluded from analyses                                                 | not described |

|                                                                                                                                                                                   |                                        |
|-----------------------------------------------------------------------------------------------------------------------------------------------------------------------------------|----------------------------------------|
|                                                                                                                                                                                   |                                        |
| not described                                                                                                                                                                     | not described                          |
| excluded from analysis                                                                                                                                                            | amplified signal, factor not described |
| not described                                                                                                                                                                     | not described                          |
| Recordings were discarded in case either of severe sleep disturbance or of electrode loosening, as detected by impedance measurements. In such cases, the recording was repeated. | refers to other publication            |

|               |               |
|---------------|---------------|
| not described | not described |

|                                                                                                                                               |               |
|-----------------------------------------------------------------------------------------------------------------------------------------------|---------------|
| Raw EMG data were first evaluated for noise signal artefacts using software (Adobe Audition Version 3; Adobe Systems Inc., San Jose, CA, USA) | 8692x         |
| not described                                                                                                                                 | not described |
| not described                                                                                                                                 | not described |

|                                                                                                                                                                                                                                                |                             |
|------------------------------------------------------------------------------------------------------------------------------------------------------------------------------------------------------------------------------------------------|-----------------------------|
|                                                                                                                                                                                                                                                |                             |
| not described                                                                                                                                                                                                                                  | not described               |
| not described                                                                                                                                                                                                                                  | refers to other publication |
| The EMG data for three out of the 20 subjects could not be included in the analysis as the electrode detached during the sleep recording.... If any distinctive artefacts were observed, those signals were manually excluded before analysis. | not described               |



|                                                                                                                       |               |
|-----------------------------------------------------------------------------------------------------------------------|---------------|
| When a single episode of bruxism last more than 30 min, it was considered as an artifact and discarded from the data. | 50000x        |
| not described                                                                                                         | not described |
| excluded from analysis                                                                                                | not described |

|                        |                                        |
|------------------------|----------------------------------------|
|                        |                                        |
| excluded from analysis | amplified signal, factor not described |
| excluded from analysis | refers to other publication            |
| excluded from analysis | not described                          |

|               |                                 |
|---------------|---------------------------------|
|               |                                 |
| not described | not described                   |
| not described | 250x plus further amplification |
| not described | 800x                            |

|                                                          |               |
|----------------------------------------------------------|---------------|
| not described                                            | not described |
| additional recordings and exclusion if failure persisted | not described |
| excluded from analysis based on quality criteria         | 800x          |

|                                                  |                             |
|--------------------------------------------------|-----------------------------|
| excluded from analysis based on quality criteria | refers to other publication |
| not described                                    | 500x                        |
| excluded from analysis                           | 800x                        |

|                                                                                                                                                                         |      |
|-------------------------------------------------------------------------------------------------------------------------------------------------------------------------|------|
| not described                                                                                                                                                           | 500x |
| it was shown that the baseline was not significantly disturbed and that stable signals with a relatively good S/N ratio were provided during the whole measurement time | 256x |
| not described                                                                                                                                                           | 800x |

---

**Signal recor**

|                       |                   |
|-----------------------|-------------------|
|                       |                   |
| Impedance measurement | Bandpass settings |
| not described         | not described     |
| not described         | not described     |
| not described         | 20 - 500 Hz       |
| not described         | not described     |

|               |               |
|---------------|---------------|
| not described | 50 - 500 Hz   |
| not described | not described |
| not described | not described |
| not described | not described |
| not described | 10 - 400 Hz   |



|                             |                             |
|-----------------------------|-----------------------------|
|                             |                             |
| not described               | 10 - 400 Hz                 |
| not described               | not described               |
| refers to other publication | refers to other publication |
| refers to other publication | refers to other publication |

|                     |               |
|---------------------|---------------|
|                     |               |
| not described       | not described |
| not described       | 10 - 400 Hz   |
| skin < 2 k $\Omega$ | not described |
| skin < 2 k $\Omega$ | 50 - 500 Hz   |

|               |               |
|---------------|---------------|
| not described | not described |
| not described | not described |
| not described | not described |

|                          |               |
|--------------------------|---------------|
|                          |               |
| not described            | not described |
| amplifier 250 M $\Omega$ | 20 - 1000 Hz  |
| skin < 10 k $\Omega$     | 20 - 600 Hz   |

|                      |               |
|----------------------|---------------|
|                      |               |
| skin < 10 k $\Omega$ | 20 - 600 Hz   |
| not described        | not described |
| not described        | not described |

|                             |                             |
|-----------------------------|-----------------------------|
|                             |                             |
| refers to other publication | refers to other publication |
| not described               | 10 - 1000 Hz                |
| amplifier 250 MΩ            | 20 - 1000 Hz                |
| not described               | not described               |

|               |                             |
|---------------|-----------------------------|
| not described | 5 - 500 Hz                  |
| not described | not described               |
| not described | not described               |
| not described | refers to other publication |

|               |                             |
|---------------|-----------------------------|
|               |                             |
| not described | refers to other publication |
| not described | refers to other publication |
| not described | not described               |
| not described | not described               |



|               |               |
|---------------|---------------|
| not described | not described |

|               |               |
|---------------|---------------|
| not described | not described |
| not described | not described |
| > 2 MΩ        | 100 - 310 Hz  |
| not described | 10 - 1000 Hz  |

|                             |                             |
|-----------------------------|-----------------------------|
| not described               | not described               |
| not described               | not described               |
| not described               | not described               |
| refers to other publication | refers to other publication |

|               |               |
|---------------|---------------|
| not described | not described |

|               |               |
|---------------|---------------|
| not described | 70 - 500 Hz   |
| not described | 250 - 600 Hz  |
| not described | not described |

|                             |                             |
|-----------------------------|-----------------------------|
|                             |                             |
| not described               | not described               |
| refers to other publication | refers to other publication |
| not described               | 5.3 - 450 Hz                |

|               |               |
|---------------|---------------|
|               |               |
| not described | 100 - 200 Hz  |
| not described | not described |
| not described | not described |

|               |                             |
|---------------|-----------------------------|
| not described | 10 - 500 Hz                 |
| not described | refers to other publication |
| not described | not described               |



|                         |               |
|-------------------------|---------------|
|                         |               |
| not described           | not described |
| amplifier 10 k $\Omega$ | 100 - 500 Hz  |
| not described           | 250 - 610 HZ  |

|               |               |
|---------------|---------------|
|               |               |
| not described | not described |
| skin < 10 kΩ  | not described |
| not described | 250 - 610 Hz  |

|                          |                             |
|--------------------------|-----------------------------|
|                          |                             |
| not described            | refers to other publication |
| amplifier 250 M $\Omega$ | 20 - 1000 Hz                |
| not described            | 250 - 610 Hz                |

|               |              |
|---------------|--------------|
| not described | 10 - 500 Hz  |
| not described | 20 - ? Hz    |
| not described | 251 - 610 Hz |

---

**ding/acquisition**

|               |                |
|---------------|----------------|
|               |                |
| Notch filter  | A/D resolution |
| not described | not described  |

|               |               |
|---------------|---------------|
| not described | not described |
| not described | 8 bit         |

|               |                             |
|---------------|-----------------------------|
| not described | 8 bit                       |
| not described | not described               |
| not described | refers to other publication |
| not described | refers to other publication |

|               |               |
|---------------|---------------|
|               |               |
| not described | not described |
| not described | 8 bit         |
| not described | 8 bit         |
| not described | 8 bit         |



|               |               |
|---------------|---------------|
| not described | 14 bit        |
| not described | not described |
| not described | not described |

|               |               |
|---------------|---------------|
|               |               |
| not described | not described |
|               |               |
| not described | not described |
|               |               |
| not described | not described |

|               |               |
|---------------|---------------|
|               |               |
| not described | not described |
| not described | not described |
| not described | not described |

|                         |                             |
|-------------------------|-----------------------------|
|                         |                             |
| not described           | not described               |
| 60 Hz (during analysis) | refers to other publication |
| not described           | not described               |
| not described           | not described               |

|                             |                             |
|-----------------------------|-----------------------------|
|                             |                             |
| not described               | 12 bit                      |
| not described               | not described               |
| not described               | 16 bit                      |
| refers to other publication | refers to other publication |

|                             |                             |
|-----------------------------|-----------------------------|
|                             |                             |
| refers to other publication | refers to other publication |
| not described               | refers to other publication |
| not described               | not described               |
| not described               | not described               |

|               |               |
|---------------|---------------|
| not described | not described |

|                         |               |
|-------------------------|---------------|
|                         |               |
| not described           | not described |
|                         |               |
| not described           | not described |
|                         |               |
| 60 Hz                   | not described |
|                         |               |
| 60 Hz (during analysis) | not described |



|               |                             |
|---------------|-----------------------------|
| not described | not described               |
| not described | not described               |
| not described | not described               |
| not described | refers to other publication |

|               |               |
|---------------|---------------|
| not described | not described |

|               |               |
|---------------|---------------|
|               |               |
| not described | 10 bit        |
| not described | 10 bit        |
| not described | not described |

|                             |               |
|-----------------------------|---------------|
|                             |               |
| not described               | not described |
| refers to other publication | not described |
| 50 Hz                       | not described |

|               |               |
|---------------|---------------|
| not described | not described |
| not described | not described |
| not described | not described |

|                             |               |
|-----------------------------|---------------|
|                             |               |
| 50 Hz                       | not described |
| refers to other publication | not described |
| not described               | not described |

|               |               |
|---------------|---------------|
|               |               |
| not described | not described |
| not described | 8 bit         |
| not described | not described |

|               |               |
|---------------|---------------|
|               |               |
| not described | not described |
|               |               |
| not described | not described |
|               |               |
| not described | not described |



|               |               |
|---------------|---------------|
|               |               |
| not described | not described |
|               |               |
| not described | not described |
|               |               |
| not described | not described |

|               |               |
|---------------|---------------|
|               |               |
| not described | 8 bit         |
| not described | 12 bit        |
| not described | not described |

---

|                         |                                                                                                             |
|-------------------------|-------------------------------------------------------------------------------------------------------------|
| Sampling rate/frequency | Device output                                                                                               |
| 1000 Hz                 | Averaged values of rectified EMG data for every second                                                      |
| not described           | Scored activity                                                                                             |
| 2000 Hz                 | rectified signal: EMG area under the curve (AUC) and root mean square value for each time interval of 500ms |
| 200 Hz                  | Raw EMG signal                                                                                              |

|               |                 |
|---------------|-----------------|
|               |                 |
| 2000 Hz       | Raw EMG signal  |
| not described | not described   |
| not described | Scored activity |
| not described | Scored activity |
| 800 Hz        | Raw EMG signal  |

|                             |                 |
|-----------------------------|-----------------|
|                             |                 |
| 800 Hz                      | Raw EMG signal  |
| not described               | Scored activity |
| refers to other publication | Scored activity |
| refers to other publication | Scored activity |

|               |                                                             |
|---------------|-------------------------------------------------------------|
| not described | Scored activity                                             |
| 800 Hz        | Raw EMG signal                                              |
| 1000 Hz       | rectified and averaged signal, with 1ms-3s integration time |
| 1000 Hz       | rectified signal, integration time 0.5sec                   |

|               |                                                                                             |
|---------------|---------------------------------------------------------------------------------------------|
| 200 Hz        | all activity > 5 $\mu$ V was recorded for 10.24 seconds and saved as a 2.048-byte text file |
| not described | not described                                                                               |
| 1000 Hz       | Raw EMG signal                                                                              |

|               |                      |
|---------------|----------------------|
| not described | Raw EMG signal       |
| 2000 Hz       | Raw EMG signal       |
| 2000 Hz       | rectified EMG signal |



|               |                      |
|---------------|----------------------|
|               |                      |
| 2001 Hz       | rectified EMG signal |
| not described | Scored activity      |
| not described | Scored activity      |

|                             |                 |
|-----------------------------|-----------------|
| not described               | Scored activity |
| refers to other publication | Raw EMG signal  |
| 2000 Hz                     | Raw EMG signal  |
| 1024 Hz                     | Raw EMG signal  |

|                             |                             |
|-----------------------------|-----------------------------|
|                             |                             |
| not described               | Raw EMG signal              |
| not described               | Scored activity             |
| 1000 Hz                     | Raw EMG signal              |
| refers to other publication | refers to other publication |

|                             |                             |
|-----------------------------|-----------------------------|
|                             |                             |
| refers to other publication | refers to other publication |
| refers to other publication | Scored activity             |
| 1000 Hz                     | Raw EMG signal              |
| 2048 Hz                     | Raw EMG signal              |

|               |                 |
|---------------|-----------------|
|               |                 |
| not described | Scored activity |
| not described | Scored activity |
| not described | Scored activity |
| 1000 Hz       | Raw EMG signal  |

|               |                                                                                                              |
|---------------|--------------------------------------------------------------------------------------------------------------|
| 1001 Hz       | Raw EMG signal                                                                                               |
| 1002 Hz       | Raw EMG signal                                                                                               |
| not described | integrated and cumulative EMG activity ( $\mu\text{V}\cdot\text{s}$ ) divided by the duration of sleep (min) |
| 22.050 Hz     | Raw EMG signal                                                                                               |

|                             |                 |
|-----------------------------|-----------------|
| 128 Hz                      | not described   |
| not described               | Scored activity |
| not described               | Scored activity |
| refers to other publication | Raw EMG signal  |

|               |                 |
|---------------|-----------------|
| not described | not described   |
| not described | not described   |
| not described | not described   |
| not described | scored activity |



|               |                 |
|---------------|-----------------|
|               |                 |
| 2000 Hz       | Raw EMG signal  |
| 2000 Hz       | Scored activity |
| not described | Raw EMG signal  |

|                             |                                          |
|-----------------------------|------------------------------------------|
| not described               | Scored activity                          |
| refers to other publication | Scored activity                          |
| 16 Hz                       | rectified and RMS transformed EMG signal |

|               |                 |
|---------------|-----------------|
| not described | Scored activity |
| not described | Scored activity |
| not described | Scored activity |

|                             |                |
|-----------------------------|----------------|
| 10 Hz                       | Raw EMG signal |
| refers to other publication | Raw EMG signal |
| not described               | Raw EMG signal |

|               |                 |
|---------------|-----------------|
| not described | Scored activity |
| 4000 Hz       | Scored activity |
| not described | Scored activity |

|               |                 |
|---------------|-----------------|
| not described | not described   |
| not described | Scored activity |
| not described | Raw EMG signal  |

|               |                 |
|---------------|-----------------|
| not described | Raw EMG signal  |
| not described | Raw EMG signal  |
| not described | Scored activity |

|               |                 |
|---------------|-----------------|
|               |                 |
| 1000 Hz       | Raw EMG signal  |
| 1000 Hz       | Raw EMG signal  |
| not described | Scored activity |



Signal a

|                                                            |                                                                                                                                                                              |               |                                     |
|------------------------------------------------------------|------------------------------------------------------------------------------------------------------------------------------------------------------------------------------|---------------|-------------------------------------|
| Definition of analysis time                                | EMG scoring software                                                                                                                                                         | Rectification | Smoothing                           |
| 30 minutes after going to bed until the moment they got up | not described                                                                                                                                                                | yes           | not described                       |
| not described                                              | built-in                                                                                                                                                                     | not described | not described                       |
| first and last 15 mins of recording excluded from analysis | customized software (Medotech, Aarhus, Denmark) for further analysis and storing of data & Jaws version 1.51 software (Aalborg University, Aalborg, Denmark) for EMG scoring | yes           | root mean square                    |
| based on subject's reporting in a diary                    | semi-automated custom software                                                                                                                                               | yes           | performed, but method not described |

|               |                                                                          |               |                                         |
|---------------|--------------------------------------------------------------------------|---------------|-----------------------------------------|
| not described | custom algorithm (Matlab R2011b, The MathWorks, Natick, MA, USA) and     | not described | integrated signal, method not described |
| not described | Bruxmeter software (version 1.1.0.3, OT Bioelettronica, Torino, Italy)   | not described | not described                           |
| not described | built-in                                                                 | not described | not described                           |
| 5 hours       | built-in                                                                 | not described | not described                           |
| based on PSG  | Bruxmeter software (OT Bioelettronica, Torino, Italy) and manual scoring | not described | not described                           |

|                                                                                                                                                         |                                                       |               |               |
|---------------------------------------------------------------------------------------------------------------------------------------------------------|-------------------------------------------------------|---------------|---------------|
| Five tapping movements before sleep and after getting up in the morning were performed, to easily recognise the beginning and the end of the recordings | Bruxmeter software (OT Bioelettronica, Torino, Italy) | not described | not described |
| not described                                                                                                                                           | built-in                                              | not described | not described |
| the first brux was related to the moment of retiring                                                                                                    | built-in                                              | not described | not described |
| not described                                                                                                                                           | built-in                                              | not described | not described |

|                                                                                                                                                                                                          |                                                       |               |                                              |
|----------------------------------------------------------------------------------------------------------------------------------------------------------------------------------------------------------|-------------------------------------------------------|---------------|----------------------------------------------|
| not described                                                                                                                                                                                            | built-in (signal recognition algorithm)               | not described | not described                                |
| not described                                                                                                                                                                                            | Bruxmeter software (OT Bioelettronica, Torino, Italy) | not described | not described                                |
| not described                                                                                                                                                                                            | not described                                         | yes           | averaged signal                              |
| <p>sleeping and awakening times were recorded. Night-time awake periods- i.e. times of total awakening during the night- did not have to be reported, but were spontaneously noted by some subjects.</p> | custom program                                        | yes           | integrated signal, intergration time 0.5 sec |

|                                                                                                                                                                                                 |                                |               |                                     |
|-------------------------------------------------------------------------------------------------------------------------------------------------------------------------------------------------|--------------------------------|---------------|-------------------------------------|
| based on participant's reporting in a diary                                                                                                                                                     | semi-automated custom software | yes           | performed, but method not described |
| not described                                                                                                                                                                                   | not described                  | not described | not described                       |
| they were also instructed to perform the maximal clenching when they awoke, which was recognized as the end of data recording. The duration of sleep was defined between 20 min after the first | custom program                 | not described | averaged signal                     |

|               |                                                           |               |                                                    |
|---------------|-----------------------------------------------------------|---------------|----------------------------------------------------|
| not described | semi-automated or fully automated custom computer program | not described | root mean square conversion                        |
| not described | computer software (MatLab 7.9 R2009b; MathWorks)          | not described | root mean square conversion in 128 ms time-windows |
| not described | not described                                             | yes           | not described                                      |

|               |                                                                                         |               |               |
|---------------|-----------------------------------------------------------------------------------------|---------------|---------------|
|               |                                                                                         |               |               |
| not described | not described                                                                           | yes           | not described |
| not described | built-in software and Grindcare Manager (Medotech A/S, DK) for transfer of data to a PC | not described | not described |
| 5 hours       | built-in                                                                                | not described | not described |

|                                                    |                                                                  |               |                                                                                          |
|----------------------------------------------------|------------------------------------------------------------------|---------------|------------------------------------------------------------------------------------------|
|                                                    |                                                                  |               |                                                                                          |
| not described                                      | built-in                                                         | not described | not described                                                                            |
| onset of sleep 10 min after last microphone signal | not described                                                    | yes           | root mean square conversion with integration time of 10 ms                               |
| not described                                      | custom software program (MATLAB, The MathWorks Inc., Natick, MA) | not described | not described                                                                            |
| not described                                      | Myomonitor software                                              | not described | root mean square conversion in .125 sec segments, and .0625 sec overlap of time segments |



|                                                                                                                                                                                     |                                                   |               |                                                                          |
|-------------------------------------------------------------------------------------------------------------------------------------------------------------------------------------|---------------------------------------------------|---------------|--------------------------------------------------------------------------|
|                                                                                                                                                                                     |                                                   |               |                                                                          |
| based on PSG                                                                                                                                                                        | not described                                     | not described | converted to absolute values and smoothed by a width of 101 points (.1s) |
| 5 hours                                                                                                                                                                             | built-in                                          | not described | not described                                                            |
| Data analysis was based on a 5-h span, starting approximately 1 h after the subjects went to bed and turned on the device and ending approximately 1 h before the subjects woke up. | SmartAnalyzer (BTS Bioengineering?, Milan, Italy) | yes           | root mean square                                                         |
| not described                                                                                                                                                                       | refers to other publication                       | not described | not described                                                            |

|                                                                                                                                                                                                      |                                                                            |               |                                                                             |
|------------------------------------------------------------------------------------------------------------------------------------------------------------------------------------------------------|----------------------------------------------------------------------------|---------------|-----------------------------------------------------------------------------|
| not described                                                                                                                                                                                        | refers to other publication                                                | not described | not described                                                               |
| not described                                                                                                                                                                                        | refers to other publication                                                | not described | not described                                                               |
| based on actigraphy                                                                                                                                                                                  | Chart 5 (AD Instruments Pty Ltd, Bella Vista, NSW, Australia)              | not described | converted to absolute value and smoothed with a width of 15 sampling points |
| The beginning of the sleep period was defined at 20 min after the first maximal clenching session or subsequent stable EMG signals and heart rate were observed. The time when EMG signals and heart | Biograph infiniti version 5.1.2 (Thought Technology, Montreal, QC, Canada) | not described | averaged at 16 Hz                                                           |

|                                                                          |                                                                                |               |                                                                      |
|--------------------------------------------------------------------------|--------------------------------------------------------------------------------|---------------|----------------------------------------------------------------------|
| 4.5 hours<br>(starting 30 min<br>after placing the<br>device)            | built-in                                                                       | not described | not described                                                        |
| 4.5 hours<br>(starting 30 min<br>after placing the<br>device)            | built-in                                                                       | not described | not described                                                        |
| not described                                                            | built-in                                                                       | not described | not described                                                        |
| first and last<br>hours of data<br>were excluded<br>from the<br>analysis | Bruxism analyzing software<br>(MTS50011, Medical Try<br>System, Tokyo, Japan). | yes           | averaged with moving<br>interval of 1 ms and window<br>time of 19 ms |

|                                                              |                                                                           |               |                                                                        |
|--------------------------------------------------------------|---------------------------------------------------------------------------|---------------|------------------------------------------------------------------------|
| first and last hours of data were excluded from the analysis | Bruxism analyzing software (MTS50011, Medical Try System, Tokyo, Japan).  | yes           | averaged with moving interval of 1 ms and window time of 19 ms         |
| not described                                                | not described                                                             | yes           | integrated signal, method not described                                |
| not described                                                | built-in                                                                  | yes           | integrated signal, intergration epoch was the entire duration of sleep |
| not described                                                | sound-editing software (Sound Engine, Coderium Co., Ltd., Sapporo, Japan) | not described | not described                                                          |

|                                                                                                                                                                                |                             |                             |                             |
|--------------------------------------------------------------------------------------------------------------------------------------------------------------------------------|-----------------------------|-----------------------------|-----------------------------|
|                                                                                                                                                                                |                             |                             |                             |
| not described                                                                                                                                                                  | not described               | not described               | not described               |
| 4.5h, starting 30 min after contact with skin                                                                                                                                  | built-in                    | not described               | not described               |
| not described                                                                                                                                                                  | built-in                    | not described               | not described               |
| Signal analysis was limited to self-reported sleep duration. In case of awakening, the EMG signal was discarded 5 min before until 5 min after self-reported wake inter- vals. | refers to other publication | refers to other publication | refers to other publication |

|               |                                              |               |               |
|---------------|----------------------------------------------|---------------|---------------|
| not described | Bruxmeter® (OT Biolettonica; Torino, Italy). | not described | not described |
| not described | not described                                | not described | not described |
| not described | not described                                | not described | not described |
| 5 hours       | built-in                                     | not described | not described |

|               |                                                       |               |                                                                                                    |
|---------------|-------------------------------------------------------|---------------|----------------------------------------------------------------------------------------------------|
| not described | MatLab version 8.0<br>(MathWorks, Natick, MA,<br>USA) | not described | root mean square amplitude<br>values calculated over 125<br>ms contiguous rectangular<br>win- dows |
| not described | built-in (signal recognition<br>algorithm)            | not described | root mean square                                                                                   |
| not described | not applicable (recordings<br>were hand scored)       | not described | not described                                                                                      |

|                                           |                |               |                             |
|-------------------------------------------|----------------|---------------|-----------------------------|
|                                           |                |               |                             |
| not described                             | built-in       | not described | not described               |
| not described                             | built-in       | yes           | refers to other publication |
| 5 hours, with 3 MVCs at the start and end | custom program | yes           | root mean square            |



|               |          |               |               |
|---------------|----------|---------------|---------------|
|               |          |               |               |
| not described | built-in | yes           | not described |
|               |          |               |               |
| 5 hours       | built-in | not described | not described |
|               |          |               |               |
| not described | built-in | not described | not described |

|                                                                                       |                                                                                    |               |                                                |
|---------------------------------------------------------------------------------------|------------------------------------------------------------------------------------|---------------|------------------------------------------------|
| based on subject's reporting in a diary plus first 15 and last 5 min of recorded data | custom program (LabVIEW 9.0, National Instruments Corporation, Austin, Texas, USA) | not described | root mean square with average factor of 100 ms |
| refers to other publication                                                           | custom program (LabVIEW 9.0, National Instruments Corporation, Austin, TX)         | not described | refers to other publication                    |
| not described                                                                         | custom made Matlab algorithm                                                       | not described | not described                                  |

30 minutes  
following  
activation

|               |          |               |               |
|---------------|----------|---------------|---------------|
|               |          |               |               |
|               | built-in | not described | not described |
|               |          |               |               |
| not described | built-in | not described | not described |
|               |          |               |               |
| not described | built-in | not described | not described |

|               |                                                                                               |               |               |
|---------------|-----------------------------------------------------------------------------------------------|---------------|---------------|
|               |                                                                                               |               |               |
| not described | not described                                                                                 | not described | not described |
| not described | built-in (signal recognition algorithm) and Grindcare Manager 3.0 software                    | not described | not described |
| not described | MATLAB and Statistics Toolbox Release 2015b (The MathWorks, Inc., Natick, Massachusetts, USA) | not described | not described |

|                                                    |                                                           |               |               |
|----------------------------------------------------|-----------------------------------------------------------|---------------|---------------|
|                                                    |                                                           |               |               |
| not described                                      | refers to other publication                               | not described | not described |
| diary of start and stop times of recording periods | newly developed algorithm (MATLAB, MathWorks, Natick, MA) | not described | not described |
| not described                                      | built-in (signal recognition algorithm)                   | not described | not described |

|               |                                         |               |               |
|---------------|-----------------------------------------|---------------|---------------|
|               |                                         |               |               |
| based on PSG  | not described                           | not described | not described |
| not described | not described                           | not described | not described |
| not described | built-in (signal recognition algorithm) | not described | not described |

---

## analysis

| Additional filtering | Threshold for EMG scoring |
|----------------------|---------------------------|
| not described        | not applicable            |
| not described        | 30% MVC                   |
| not described        | 3%, 10% and 20% MVC       |
| not described        | 20% MVC                   |

|               |         |
|---------------|---------|
| not described | 5% MVC  |
| not described | 10% MVC |
| not described | 30% MVC |
| not described | 30% MVC |
| not described | 10% MVC |



|               |               |
|---------------|---------------|
| not described | 10% MVC       |
| not described | 100 $\mu$ V   |
| not described | not described |
| not described | not described |

|               |                                                                                           |
|---------------|-------------------------------------------------------------------------------------------|
|               |                                                                                           |
| not described | 20% of 60% MVC                                                                            |
| not described | 10% MVC                                                                                   |
| not described | 20% of highest occurring bursts                                                           |
| not described | The threshold was set to the maximum amplitude of the signals of the simulated artifacts. |

|               |               |
|---------------|---------------|
|               |               |
| not described | 20% & 50% MVC |
| not described | not described |
| not described | 10% MVC       |

|                 |                                                                                               |
|-----------------|-----------------------------------------------------------------------------------------------|
| not described   | 10% MVC (selected among 3%, 10% and 20%)                                                      |
| low-level noise | 5–9, 10–24, 25–49, 50–79 and $\geq 80\%$ $T_{20N}$ in each 128ms time-window of the recording |
| not described   | not applicable                                                                                |

|               |                |
|---------------|----------------|
|               |                |
| not described | not applicable |
| not described | 20% MVC        |
| not described | 30% MVC        |

|                                               |                                                                                                             |
|-----------------------------------------------|-------------------------------------------------------------------------------------------------------------|
| not described                                 | not described                                                                                               |
| 500 Hz low-pass filter and 60 Hz notch filter | 20% MVC                                                                                                     |
| not described                                 | 4 magnitude thresholds (10, 25, 50 & 20% of 20N bite force) and 6 duration points (1, 2, 5, 10, 15 and 20s) |
| not described                                 | 10% and 20% MVC                                                                                             |

|                             |                                                                                                          |
|-----------------------------|----------------------------------------------------------------------------------------------------------|
| high pass filtered at 20 Hz | > 2x baseline amplitude, and among those 5%, 10%, and 20% MVC                                            |
| not described               | 30% MVC                                                                                                  |
| not described               | three swallowing movements to set the cut-off values (average RMS muscle activity of the three attempts) |
| not described               | refers to other publication                                                                              |

|                             |                                                                 |
|-----------------------------|-----------------------------------------------------------------|
|                             |                                                                 |
| not described               | 10% MVC                                                         |
| not described               | 10% MVC                                                         |
| high pass filtered at 20 Hz | > 2x baseline EMG activity during resting,<br>10% MVC & 20% MVC |
| not described               | 10% MVC                                                         |



|               |               |
|---------------|---------------|
| not described | not described |
| not described | 30% MVC       |
| not described | not described |
| not described | 10% MVC       |

|                                                                                 |                                                      |
|---------------------------------------------------------------------------------|------------------------------------------------------|
|                                                                                 |                                                      |
| not described                                                                   | 10% MVC                                              |
| not described                                                                   | > 3x resting state standard deviations               |
| not described                                                                   | 1 $\mu$ V                                            |
| low-pass filter of 200 Hz,<br>notch filter 60 Hz and down-<br>samples to 100 Hz | 2x baseline noise level during resting<br>conditions |

|                             |                             |
|-----------------------------|-----------------------------|
|                             |                             |
| not described               | 30% MVC                     |
| not described               | 30% MVC                     |
| not described               | not described               |
| refers to other publication | refers to other publication |

|               |               |
|---------------|---------------|
|               |               |
| not described | 10% MVC       |
| not described | not described |
| not described | 20% MVC       |
| not described | 30% MVC       |

|               |                                                                                                                                        |
|---------------|----------------------------------------------------------------------------------------------------------------------------------------|
| not described | .625 Hz peak frequency and 2% relative power (of spectrogram acquired after fast-Fourier transformation of the demodulated EMG signal) |
| not described | 20% of 60% MVC                                                                                                                         |
| not described | 20 $\mu$ V                                                                                                                             |

|                             |            |
|-----------------------------|------------|
|                             |            |
| not described               | 20 $\mu$ V |
| refers to other publication | 20 $\mu$ V |
| not described               | 20% MVC    |

|               |                |
|---------------|----------------|
|               |                |
| not described | not described  |
| not described | 30% MVC        |
| not described | 20% of 60% MVC |

|               |                             |
|---------------|-----------------------------|
|               |                             |
| not described | 10 $\mu$ V                  |
| not described | 10 $\mu$ V                  |
| not described | refers to other publication |



|               |                                                                                                                               |
|---------------|-------------------------------------------------------------------------------------------------------------------------------|
| not described | 30% MVC                                                                                                                       |
| not described | Whenever the fourth least significant bit of the analogue-to-digital convertor was active, a bruxing episode was occurring, . |
| not described | 20% of 60% MVC                                                                                                                |

|               |                                                            |
|---------------|------------------------------------------------------------|
| not described | not described                                              |
| not described | 10% MVC, 20% MVC and signal recognition algorithm analysis |
| not described | > 3x amplitude of background noise                         |

|               |                                                     |
|---------------|-----------------------------------------------------|
|               |                                                     |
| not described | 20% MVC                                             |
| not described | 4x standard deviation of background<br>EMG activity |
| not described | 20% of 60% MVC                                      |

|               |                      |
|---------------|----------------------|
| not described | 2x baseline activity |
| not described | 20% MVC              |
| not described | 20% of 60% MVC       |

|                                                                                                                                                                                                                                                                                                                                                                                                                                                                                                                                                              |                                      |
|--------------------------------------------------------------------------------------------------------------------------------------------------------------------------------------------------------------------------------------------------------------------------------------------------------------------------------------------------------------------------------------------------------------------------------------------------------------------------------------------------------------------------------------------------------------|--------------------------------------|
| Definition of event                                                                                                                                                                                                                                                                                                                                                                                                                                                                                                                                          | Use of RMMA term as outcome variable |
| integrated EMG values of each analyzed period                                                                                                                                                                                                                                                                                                                                                                                                                                                                                                                | no                                   |
| Continuously throughout the recording period the device registers the electromyographic masseter events that are at or above threshold for more than 0.25 s. A single registered count is limited to 1 s. A longer event (exceeding 0.25 s following to the event already counted) is registered as an additional event                                                                                                                                                                                                                                      | no                                   |
| not described                                                                                                                                                                                                                                                                                                                                                                                                                                                                                                                                                | no                                   |
| Every EMG elevation above 20% MVC level was identified as a potential event. Interval and duration criteria were used to further condition these events as follows: (1) two consecutive events with an interval of less than 2 seconds were linked; and (2) events with a duration shorter than 2 seconds were excluded. The remaining events were displayed on the computer screen with original raw signals, and the scorer cleaned any artifact signals manually. Finally, the interval and duration criteria were applied to the remaining events again. | no                                   |

|                                                                                                                                                                                                                                                                              |            |
|------------------------------------------------------------------------------------------------------------------------------------------------------------------------------------------------------------------------------------------------------------------------------|------------|
| <p>threshold for the signal = 5 % of maximal voluntary contraction, pause time = 5 s, minimal duration of the activity = 0.5 s, maximal voluntary contraction = 0.054 mV (measured as an average from four consecutive clenches three seconds long with 15 s intervals).</p> | <p>no</p>  |
| <p>A true SB episode was considered when masseter electromyography values were greater than 10% of MVC, immediately preceded (1–5 s) by a heart rate increase of 20% with respect to the mean heart rate</p>                                                                 | <p>no</p>  |
| <p>Contractions above 30% of the maximum voluntary contraction</p>                                                                                                                                                                                                           | <p>no</p>  |
| <p>Contractions exceeding 30% of the maximum muscle voluntary clenching are considered an SB episode</p>                                                                                                                                                                     | <p>no</p>  |
| <p>The software is able to classify a SB episode if the sEMG burst is greater than 10% MVC and if it immediately follows (1–5 s interval) a heart rate increase of 20% with respect to the baseline</p>                                                                      | <p>yes</p> |

|                                                                                                                                                                                                                                                                                              |    |
|----------------------------------------------------------------------------------------------------------------------------------------------------------------------------------------------------------------------------------------------------------------------------------------------|----|
| Masseter EMG bursts with duration exceeding 0.25 s were selected for oromotor activity scoring. Mean masseter EMG amplitude at least 10% of maximum voluntary clenching activity, preceded (1-5 s interval) by an approximately 20% increase of heart rate (beginning 1s before RMMA onset). | no |
| A 100 $\mu$ v, 300Hz signal maintained for 1s will provide a readout of 1 'EMG unit'                                                                                                                                                                                                         | no |
| not described                                                                                                                                                                                                                                                                                | no |
| not described                                                                                                                                                                                                                                                                                | no |

|                                                                                                                                                                                                                                                                                                                                                                                                                                                                                                                                                                                                |            |
|------------------------------------------------------------------------------------------------------------------------------------------------------------------------------------------------------------------------------------------------------------------------------------------------------------------------------------------------------------------------------------------------------------------------------------------------------------------------------------------------------------------------------------------------------------------------------------------------|------------|
| <p>The determination of the number of events was done based on the algorithm, which considered an event to be when the EMG activity exceeded the previously adjusted signal level at rest plus 20% of the maximum EMG level during the 60% (MVC) contraction.</p>                                                                                                                                                                                                                                                                                                                              | <p>no</p>  |
| <p>A SB episode is scored when the EMG burst is &gt; 10% MVC, lasts &gt; .25s, and if it immediately follows (1-5s interval) a heart rate increase of 20% with respect to the baseline. oromotor episodes separated by 3 s intervals were recognized as RMMA if they corresponded to one of the three following patterns: phasic (three or more EMG bursts each lasting 0.25–2 s), tonic (one EMG burst &gt;2 s), or mixed (both burst types) episodes.</p>                                                                                                                                    | <p>yes</p> |
| <p>A bruxism episode was defined as a supra-threshold signal portion delimited by a quiescent interval of a minimum of 3 s from the next supra-threshold signal period. A bruxism episode could contain sub-threshold signal portions provided that they were shorter than 3 s. Episodes of isolated bursts of less than 0.25 s were scored as myoclonus</p>                                                                                                                                                                                                                                   | <p>no</p>  |
| <p>A contraction episode was defined as a signal portion above a threshold <math>A_0</math> which could contain sub-threshold signal portions shorter than a stand-by time <math>t_0</math> of 5 sec. In other words, the beginning of the contraction episode corresponded to a positive crossing of the threshold value and its end to the following first negative threshold crossing, followed by a sub-threshold signal portion longer than <math>t_0</math>. Thus, a contraction episode could contain sub-threshold portions, provided that they were shorter than <math>t_0</math></p> | <p>no</p>  |



|                                                                                                                                                                                                                                                                                                                                                                                                                                                                                                                                                                                                                                                                                                                                                      |           |
|------------------------------------------------------------------------------------------------------------------------------------------------------------------------------------------------------------------------------------------------------------------------------------------------------------------------------------------------------------------------------------------------------------------------------------------------------------------------------------------------------------------------------------------------------------------------------------------------------------------------------------------------------------------------------------------------------------------------------------------------------|-----------|
| <p>Every EMG elevation above 20% MVC level was identified as a potential event. Interval and duration criteria were used to further condition these events as follows: (1) two consecutive events with an interval of less than 2 seconds were linked; and (2) events with a duration shorter than 2 seconds were excluded. the remaining events were displayed on the computer screen with original raw signals, and the scorer cleaned any artifact signals manually. Finally, the interval and duration criteria were applied to the remaining events again. A separate count of all bruxism events with a threshold above the 50% MVC level was also collected, but the minimum interval and duration criteria were not used for these data.</p> | <p>no</p> |
| <p>not described</p>                                                                                                                                                                                                                                                                                                                                                                                                                                                                                                                                                                                                                                                                                                                                 | <p>no</p> |
| <p>(i) EMG evaluations above 10% MVC; (ii) two consecutive events with an interval of &lt;5 s were linked; and (iii) events with duration shorter than 3 s were excluded</p>                                                                                                                                                                                                                                                                                                                                                                                                                                                                                                                                                                         | <p>no</p> |

|                                                                                                                                                                                                                                                                                                                                                                                                                                                                                                                                                                                                                                                                                                                                                                                                                                                                                                                                                                                                |           |
|------------------------------------------------------------------------------------------------------------------------------------------------------------------------------------------------------------------------------------------------------------------------------------------------------------------------------------------------------------------------------------------------------------------------------------------------------------------------------------------------------------------------------------------------------------------------------------------------------------------------------------------------------------------------------------------------------------------------------------------------------------------------------------------------------------------------------------------------------------------------------------------------------------------------------------------------------------------------------------------------|-----------|
| <p>10% MVC + &lt;5 sec between events (offset to next onset) + &gt; 3 sec in length (onset to offset)<br/>+ &gt; 5% bpm heart reate change during EMG event</p>                                                                                                                                                                                                                                                                                                                                                                                                                                                                                                                                                                                                                                                                                                                                                                                                                                | <p>no</p> |
| <p>Individual-specific EMG vs. bite-force data from repeated standardized laboratory tasks were used to normalize and calibrate each subject's ambulatory EMG data. Overall mean masseter and temporalis muscle activities required to produce a threshold bite-force of 20 N (<math>T_{20N}</math>, mV) were estimated based on laboratory experimental tasks. The <math>T_{20N}</math> threshold was used to score EMG activity during sleep: Software automati- cally processed data in each 128 ms time-win- dow using subject- and muscle-specific threshold intervals: 5–9, 10–24, 25–49, 50–79 and <math>\geq 80\%</math> <math>T_{20N}</math>. The number of windows meeting each inclusion criteria was added, and DF for each of the threshold intervals was calculated according to the equation: <math>DF = (\#windows)128ms / total\ recording\ time</math>. (DF= duty factor, or the amount of time each muscle was activated at specific magnitudes during a given time, %)</p> | <p>no</p> |
| <p>Signal recognition algorithm (SRA) The method was a stochastic signal processing, where the patient should first perform the set-up procedure to establish the individual parameters. The device monitored the frequency content, when the patients were asked to grind his/her teeth during the set-up procedure. When these patterns were determined, they were collected in a table and stored in a memory, which was accessible for the microprocessor. To determine an EMG event associated with bruxism, a correlation was ascertained between the frequency content of the EMG signal from the continuous meas- urements and the recorded EMG signals, which was already stored in the table. The EMG activity was recognized during sleep when the window frequencies matched the frequencies content of the EMG signals from the stored table.</p>                                                                                                                                 | <p>no</p> |

|                                                                                                                                                                                                                                                                                                                                                                                                                                                                                                                                                                                                                                                                                                                                                                                                                                                                                                                                                                                                                                                           |           |
|-----------------------------------------------------------------------------------------------------------------------------------------------------------------------------------------------------------------------------------------------------------------------------------------------------------------------------------------------------------------------------------------------------------------------------------------------------------------------------------------------------------------------------------------------------------------------------------------------------------------------------------------------------------------------------------------------------------------------------------------------------------------------------------------------------------------------------------------------------------------------------------------------------------------------------------------------------------------------------------------------------------------------------------------------------------|-----------|
| <p>The online analysis of the EMG activity was based on a signal recognition algorithm (SRA) of the frequency domain specifically associated with the tooth-grinding/tooth-clenching EMG activity determined in the set-up procedure</p>                                                                                                                                                                                                                                                                                                                                                                                                                                                                                                                                                                                                                                                                                                                                                                                                                  | <p>no</p> |
| <p>Grinds: EMG activity with duration of more than 0.1 s with amplitude higher than 20% of the maximum EMG level during setup. Each grind is defined to last for one second. Bursts: EMG activity with duration of more than 0.25 s, with amplitude three times larger than the background level. A phasic burst is defined by EMG activity of 0.25 s to two seconds duration. A tonic burst is defined as EMG activity lasting more than two seconds. Only bursts that are part of an episode are counted. Episodes: Three different types of episodes can be defined: Phasic, tonic or mixed. A phasic episode is defined by at least three phasic bursts separated by two inter-burst intervals (at least 3 s each). A tonic episode is defined as one or more tonic bursts also separated by two inter-burst intervals. A mixed episode is a combination of phasic and tonic bursts. Intensity: Intensity is the total area under the EMG curve, for all bursts being part of an episode, summed up over one night, measured in mV · s (seconds).</p> | <p>no</p> |
| <p>SB episodes were recorded as those that exceeded 30% of maximum voluntary clenching and lasted over 0.25 seconds.</p>                                                                                                                                                                                                                                                                                                                                                                                                                                                                                                                                                                                                                                                                                                                                                                                                                                                                                                                                  | <p>no</p> |

|                                                                                                                                                                                                                                                                                                                                                                                                                                                                                                                                      |    |
|--------------------------------------------------------------------------------------------------------------------------------------------------------------------------------------------------------------------------------------------------------------------------------------------------------------------------------------------------------------------------------------------------------------------------------------------------------------------------------------------------------------------------------------|----|
| not described                                                                                                                                                                                                                                                                                                                                                                                                                                                                                                                        | no |
| refers to Velly et al. 1992                                                                                                                                                                                                                                                                                                                                                                                                                                                                                                          | no |
| <p>Duty factor is the percentage of time when a respective muscle has been active above a certain threshold out a total given time (duration of muscle activity/ duration of recording period × 100 %). For each muscle type and subject, DF was determined for 4 magnitude and 6 duration thresholds in two different time periods (awake and sleep) and across 3 days. The combination of duty factors allowed estimating “Masticatory Muscle Activity” as outcome variable with mutually exclusive values</p>                     | no |
| <p>The segment of time over which the root mean square value was computed was 0.125 sec, and the overlap of time segments was 0.0625 sec. From these data, the number of bruxism events per hour was calculated using the criteria of Haketa et al. (2003): (1) a root mean square EMG amplitude above the 20% MVC level, (2) events with duration longer than 2 secs, and (3) the interval between each separate event were longer than 2 secs. The data were also analyzed using 10% MVC as the threshold for a bruxism event.</p> | no |

|                                                                                                                                                                                                                                                                                                                                                                                                                                                                                                                                                                                                                                                                                                                                                                                                                              |    |
|------------------------------------------------------------------------------------------------------------------------------------------------------------------------------------------------------------------------------------------------------------------------------------------------------------------------------------------------------------------------------------------------------------------------------------------------------------------------------------------------------------------------------------------------------------------------------------------------------------------------------------------------------------------------------------------------------------------------------------------------------------------------------------------------------------------------------|----|
| <p>Bursts of more than two times the baseline amplitude and with a duration of 0.25 s or more and with an interval of 0.08 s or more to the adjacent burst were selected (named EMG-burst-all). Furthermore, from EMG-burst- all, bursts with a more than 5%MVC value (EMG-burst-5%), bursts with more than a 10%MVC value (EMG-burst-10%) and waves with more than a 20%MVC value (EMG-burst-20%) were selected for analyses. By an episode unit, clusters of bursts that corresponded to the following three criteria were selected as episodes (EMG- episodes): (1) a phasic episode consisting of three or more phasic bursts that lasted 0.25 to 2.0 s, (2) a tonic episode consisting of one or more tonic burst (s) longer than 2.0 s and (3) a mixed episode consisting of a phasic episode and a tonic episode.</p> | no |
| <p>contractions that exceed 30% of the maximum voluntary clenching muscle activity was considered to be an SB episode</p>                                                                                                                                                                                                                                                                                                                                                                                                                                                                                                                                                                                                                                                                                                    | no |
| <p>The software was set to automatically detect any EMG event with a higher amplitude with respect to the RMS recorded with swallowing movements</p>                                                                                                                                                                                                                                                                                                                                                                                                                                                                                                                                                                                                                                                                         | no |
| <p>Refers to Castoflorio et al. 2014, Farina et al. 2001, and Castoflorio et al. 2005</p>                                                                                                                                                                                                                                                                                                                                                                                                                                                                                                                                                                                                                                                                                                                                    | no |

|                                                                                                                                                                                                                                                                                                                                                                                                                                                                                                                          |            |
|--------------------------------------------------------------------------------------------------------------------------------------------------------------------------------------------------------------------------------------------------------------------------------------------------------------------------------------------------------------------------------------------------------------------------------------------------------------------------------------------------------------------------|------------|
| <p>both the SB events (i.e., masseter contractions exceeding the 10% of maximum voluntary contraction [MVC] amplitude and preceded by a 20% increase in hearth rate) and the overthreshold masseter contractions not preceded by the hearth rate increase were recorded. The latter were here called sleep-time masticatory muscle activity (sMMA )events.</p>                                                                                                                                                           | <p>no</p>  |
| <p>SB events (ie, masseter contractions exceeding 10% of the maximum voluntary contraction [MVC] amplitude and preceded by a 20% increase in heart rate). In addition, all suprathreshold masseter contractions that were not preceded by a heart rate increase were also scored (sMMA).</p>                                                                                                                                                                                                                             | <p>no</p>  |
| <p>RMMA was defined as three or more consecutive bursts of masseter EMG activity. For the present study, in order to perform rhythm analysis more clearly, the authors selected the RMMA episodes that consisted of five or more consec- utive phasic bursts, each lasting for 0.25–2.0 s, but not separated by an interval of 3 s or more. Then the first burst of the episode was excluded from further analysis in this study because the state of a pair of interval and duration phase of the burst was needed.</p> | <p>yes</p> |
| <p>(i) EMG elevations above 10% MVC; (ii) two consecutive events with an interval of &lt;5s were linked; and (iii) events with a duration shorter than 3 s were excluded</p>                                                                                                                                                                                                                                                                                                                                             | <p>no</p>  |

|                                                                                                                                                                                                                                                                                                                                                                                                                                                                                                                                                                                                                 |     |
|-----------------------------------------------------------------------------------------------------------------------------------------------------------------------------------------------------------------------------------------------------------------------------------------------------------------------------------------------------------------------------------------------------------------------------------------------------------------------------------------------------------------------------------------------------------------------------------------------------------------|-----|
| not described                                                                                                                                                                                                                                                                                                                                                                                                                                                                                                                                                                                                   | no  |
| SB events that exceed the continuous 30% maximum voluntary clenching and last more than 0.25 s                                                                                                                                                                                                                                                                                                                                                                                                                                                                                                                  | no  |
| not described                                                                                                                                                                                                                                                                                                                                                                                                                                                                                                                                                                                                   | no  |
| EMG bursts with amplitudes that were more than 10% of the amplitude during maximum voluntary clenching of the teeth were selected. <sup>5</sup> The phasic type of bruxism episode corresponded to at least 3 bursts of 0.25- to 2.0-seconds duration with less than 3.0-seconds separation, and the tonic type of bruxism episode corresponded to a single burst lasting more than 2.0 seconds. The mixed type of bruxism episode consisted of both phasic and tonic types. Phasic and mixed types of bruxism episodes were selected as RMMA episodes. The RMMA episodes were confirmed from audio-video data. | yes |

|                                                                                                                                                                                                                                                                                                                                                                                                                                                                                                                                                                                                                                                                                                                                                    |            |
|----------------------------------------------------------------------------------------------------------------------------------------------------------------------------------------------------------------------------------------------------------------------------------------------------------------------------------------------------------------------------------------------------------------------------------------------------------------------------------------------------------------------------------------------------------------------------------------------------------------------------------------------------------------------------------------------------------------------------------------------------|------------|
| <p>The phasic type of bruxism episode consisted of at least 3 EMG bursts of 0.25 to 2.0 seconds duration with less than 3.0 seconds separation, and the tonic type, to a single burst lasting more than 2.0 seconds. The mixed bruxism episode consisted of both phasic and tonic types. Phasic and mixed types of bruxism episodes were selected as RMMA episodes. The tonic episodes were selected as clenching episodes. RMMA and clenching episodes were confirmed from audiovisual data. A single EMG burst without any more bursts within 3 seconds was selected as a short-burst episode, often corresponding to saliva swallowing. The remaining EMG bursts with less than 3.0 seconds separation were selected as other EMG episodes.</p> | <p>yes</p> |
| <p>EMG activity that exceeded the mean of the resting state with three standard deviations and lasted more than 0.25 seconds was defined as an EMG burst. Multiple EMG bursts lasting more than 3 seconds were considered to be an SB event</p>                                                                                                                                                                                                                                                                                                                                                                                                                                                                                                    | <p>no</p>  |
| <p>All myoelectrical currents, exceeding a threshold level of one microvolt, were amplified 2000 times and stored cumulatively</p>                                                                                                                                                                                                                                                                                                                                                                                                                                                                                                                                                                                                                 | <p>no</p>  |
| <p>Lavigne 1996 criteria</p>                                                                                                                                                                                                                                                                                                                                                                                                                                                                                                                                                                                                                                                                                                                       | <p>no</p>  |



|                                                                                                                                                                                           |    |
|-------------------------------------------------------------------------------------------------------------------------------------------------------------------------------------------|----|
| event was defined as $\geq 30\%$ MVC, $\geq 3$ s in duration and $\geq 5$ s interval for counting                                                                                         | no |
| This device counts the number of masseter muscle hyperactivities as the number of SB events that exceed the continuous 30% maximum voluntary clenching                                    | no |
| not described                                                                                                                                                                             | no |
| Activity periods (AP) were determined as signal portions above an artefact cut-off threshold A0 that could contain subthreshold signal portions shorter than a standby time $t_0$ of 5 s. | no |

|                                                                                                                                                                                                                                                                                                                                                                                                                        |           |
|------------------------------------------------------------------------------------------------------------------------------------------------------------------------------------------------------------------------------------------------------------------------------------------------------------------------------------------------------------------------------------------------------------------------|-----------|
| <p>a sleep bruxism episode if the surface EMG burst (bilaterally from the masseter) is greater than 10% of maximum voluntary clenching and if it immediately follows (1–5 s interval) an increase in heart rate of 20% with respect to the baseline</p>                                                                                                                                                                | <p>no</p> |
| <p>not described</p>                                                                                                                                                                                                                                                                                                                                                                                                   | <p>no</p> |
| <p>Bruxism bursts were defined as EMG potentials with an amplitude of at least 20% of maximum voluntary contractions. Bruxism episodes were phasic, tonic or mixed (both phasic and tonic) episodes. Phasic episodes corresponded to at least three EMG bursts of 0.25 to 2.0 seconds in duration, separated by two interburst intervals. Tonic episodes corresponded to EMG bursts lasting more than 2.0 seconds.</p> | <p>no</p> |
| <p>contractions that exceeded 30% of the maximum voluntary clenching muscle activity</p>                                                                                                                                                                                                                                                                                                                               | <p>no</p> |

|                                                                                                                                                                                                                                                                                                                                                                                                                                                                                                                                                                                                                                                                                                                                                                                                          |            |
|----------------------------------------------------------------------------------------------------------------------------------------------------------------------------------------------------------------------------------------------------------------------------------------------------------------------------------------------------------------------------------------------------------------------------------------------------------------------------------------------------------------------------------------------------------------------------------------------------------------------------------------------------------------------------------------------------------------------------------------------------------------------------------------------------------|------------|
| <p>The spectrogram of the demodulated EMG activity envelope was then used to score RMMA episodes. An RMMA episode was defined as a portion of the spectrogram above two predefined frequency and power thresholds. An episode had to last more than 1.5 s and had to contain at least three bursts. The algorithm allowed automatic detection of onset and cessation of rhythmic contraction episodes based on thresholds for peak frequency and relative power, set at 0.625 Hz and 2%, respectively. These settings were calculated using receiving operating characteristics curves to discard possible movement artefacts due to a variety of oral behaviours, including swallowing (Farella et al., 2009). When two RMMA episodes were separated by &lt;2 s, they were merged into one episode.</p> | <p>yes</p> |
| <p>When the amplitude of the EMG signal has been above the threshold for more than 100 ms, an event is recorded. An event can represent a voltage that exceeds threshold for up to 1 second; longer continuing events are counted as additional events.</p>                                                                                                                                                                                                                                                                                                                                                                                                                                                                                                                                              | <p>no</p>  |
| <p>A bruxism event was defined as. Burst of masseter EMG activity exceeding the present threshold and lasting for more than 1 second.</p>                                                                                                                                                                                                                                                                                                                                                                                                                                                                                                                                                                                                                                                                | <p>no</p>  |

|                                                                                                                                                             |    |
|-------------------------------------------------------------------------------------------------------------------------------------------------------------|----|
|                                                                                                                                                             |    |
| Surface EMG activity above 20 $\mu$ V                                                                                                                       | no |
| Surface EMG activity above 20 $\mu$ V                                                                                                                       | no |
| each burst with duration between 0.25 and 2.0 seconds with >20% MVC activity was regarded as an individual event regardless of the interburst interval time | no |

|                                                                                                                                                                                                                                                                                                                                                                                                                                                                                                                                                                                                                                                                                                                             |    |
|-----------------------------------------------------------------------------------------------------------------------------------------------------------------------------------------------------------------------------------------------------------------------------------------------------------------------------------------------------------------------------------------------------------------------------------------------------------------------------------------------------------------------------------------------------------------------------------------------------------------------------------------------------------------------------------------------------------------------------|----|
| <p>After amplification and rectification, it goes through the leaky integration circuit with the time constant of 0.1 s, and then it is compared with the threshold level. The threshold level is manually changeable, and when the processed signal gets higher than the threshold level, the digital circuit records the beginning time. When it gets lower than the threshold level, the device records the ending time. The period between the beginning and the ending time is recorded as a lasting time of each bruxism activity. If the lasting time is less than 1 s, the data is discarded and not recorded. The total of electromyographic potentials during the beginning and ending time is also recorded.</p> | no |
| <p>The BiteStrip detects a bruxism episode when the EMG masseter contraction exceeds 30% of the maximum occlusal force</p>                                                                                                                                                                                                                                                                                                                                                                                                                                                                                                                                                                                                  | no |
| <p>The GrindCare device has a threshold for starting to measure EMG activity, which is 20% of the 60%MVC. The burst-detection criterion used by the GrindCare device was EMG activity with a duration of &gt;0.25 s. A phasic burst was defined as an EMG activity of 0.25–2-s duration. A tonic burst was defined as an EMG activity lasting &gt;2s.</p>                                                                                                                                                                                                                                                                                                                                                                   | no |

|                                                                                                                                                                                                                                                                                                                                                                                                                              |     |
|------------------------------------------------------------------------------------------------------------------------------------------------------------------------------------------------------------------------------------------------------------------------------------------------------------------------------------------------------------------------------------------------------------------------------|-----|
| <p>An EMG burst was defined as a supra-threshold EMG signal of 0.25 to 2.0 s duration according to Lavigne et al 1996. A rhythmic NMMA episode corresponds to at least three EMG bursts separated by two interburst intervals. Two NMMA episodes had to be separated by more than 3.0 s. We chose not to include tonic EMG episodes (EMG bursts lasting more than 2.0 s) since they only represent a minor part of NMMA.</p> | no  |
| <p>A burst was defined as a supra-threshold EMG signal (above 10 mV) of 0.25- to 2.0-second duration according to Lavigne et al.</p>                                                                                                                                                                                                                                                                                         | no  |
| <p>EMG events detected by GC4-<math>\beta</math> using a built-in algorithm, which is characterized by a comparison of EMG amplitude to the estimated background level (moving average) and applying the rules for detection of RMMA activity as described by Lavigne and collaborators</p>                                                                                                                                  | yes |

|                                                                                                                                                                                                                                                                                                                                                           |           |
|-----------------------------------------------------------------------------------------------------------------------------------------------------------------------------------------------------------------------------------------------------------------------------------------------------------------------------------------------------------|-----------|
| <p>electromyographic masseter events that are at or above threshold for more than 0.25 second. A single count is limited to 1 second, thus an event longer than 1 second is counted as an additional event, as long as the additional time following the event already counted exceeds 0.25 second.</p>                                                   | <p>no</p> |
| <p>Whenever the fourth least significant bit of the analogue-to-digital convertor was active, a bruxing episode was occurring, and if the duration was equal to or greater than 2 s the event was stored in r.a.m, for later transfer to cassette tape. The cassette tape was eventually used to obtain a hard-copy printout of all bruxing episodes.</p> | <p>no</p> |
| <p>One EMG event is recorded in the log file when the amplitude of the EMG signal exceeds the threshold for more than 100 ms for up to 1s. Longer lasting EMG events are counted as additional events.</p>                                                                                                                                                | <p>no</p> |

|                                                                                                                                                                                                                                                                                                                                                                                                                                                 |    |
|-------------------------------------------------------------------------------------------------------------------------------------------------------------------------------------------------------------------------------------------------------------------------------------------------------------------------------------------------------------------------------------------------------------------------------------------------|----|
| Lavigne 1996 criteria                                                                                                                                                                                                                                                                                                                                                                                                                           | no |
| <p>When the EMG signal amplitude crossed the threshold level and the window frequencies of the obtained EMG activity matched the frequencies of the EMG signals from the stored table, an EMG event was recognized and recorded. This process was repeated at a pace of approximately once per second as long as the EMG activity was above the threshold. For example, continuous grinding that lasted for 5 s was counted as five events.</p> | no |
| <p>EMG events were scored using a 'moving average' (MA) algorithm, which uses a dynamic method to score events when the EMG signal exceeds the amplitude of the background noise with 3 or more times, for a duration of <math>\geq 0.25</math> s</p>                                                                                                                                                                                           | no |



|                                                                                                                                                                                                                                                                                                                                                                                                                                                                                                                                                                                                                                                                                                                                                                                  |           |
|----------------------------------------------------------------------------------------------------------------------------------------------------------------------------------------------------------------------------------------------------------------------------------------------------------------------------------------------------------------------------------------------------------------------------------------------------------------------------------------------------------------------------------------------------------------------------------------------------------------------------------------------------------------------------------------------------------------------------------------------------------------------------------|-----------|
| <p>refers to Lavigne et al. 1996</p>                                                                                                                                                                                                                                                                                                                                                                                                                                                                                                                                                                                                                                                                                                                                             | <p>no</p> |
| <p>The threshold for a sustained clench was based on predefined tasks that were performed in the laboratory. The normalized RMS value of the background EMG activity during the predefined tasks was calculated for defining standard deviation (<math>\sigma</math>) thresholds. The amplitude threshold was set to <math>4\sigma</math>. A sustained clench episode was defined as a signal whose square wave occurred for longer than 0.5 seconds. The start and stop times of each identified epoch of clenching behavior were logged to reference with the raw EMG signals, and subject-specific laboratory calibrations of temporalis muscle activity (<math>\mu\text{V}</math>) per N of bite-force were used to estimate magnitude of clenching load for each epoch.</p> | <p>no</p> |
| <p>The algorithm counts an event when the EMG activity exceeds the signal level at rest, plus 20% of the maximum EMG level during the 60% contraction.</p>                                                                                                                                                                                                                                                                                                                                                                                                                                                                                                                                                                                                                       | <p>no</p> |

|                                                                                                                                                                                                                                                                                                                                             |            |
|---------------------------------------------------------------------------------------------------------------------------------------------------------------------------------------------------------------------------------------------------------------------------------------------------------------------------------------------|------------|
| <p>oromotor episodes (OME) separated by 3-s intervals were recognised as RMMA if they corresponded to one of the three following patterns: phasic (three or more masseter-temporalis EMG bursts, each lasting 0.25–2.0 s), tonic (one masseter-temporalis EMG burst &gt;2.0 s) or mixed (both masseter-temporalis burst types) episodes</p> | <p>yes</p> |
| <p>Refers to Thorpy et al. 1997 and Lavigne et al. 2001</p>                                                                                                                                                                                                                                                                                 | <p>yes</p> |
| <p>analysed for events of EMG activity using a Signal Recognition Algorithm described by Jadidi et al</p>                                                                                                                                                                                                                                   | <p>no</p>  |

**Outcomes**

| Diagnosis of "sleep bruxer" through cut-off criteria                                                                                                                         | Frequency1                      | Frequency2 | Frequency3 | Frequency4 | Frequency5 |
|------------------------------------------------------------------------------------------------------------------------------------------------------------------------------|---------------------------------|------------|------------|------------|------------|
| no                                                                                                                                                                           |                                 |            |            |            |            |
| 0 –no bruxism: (comparable to a sleep laboratory bruxism count of up to 39 over 5 h), 1 – mild: (40–74 counts), 2 – moderate: (75–124 counts) and 3 – severe: (>125 counts). | score based on events/recording |            |            |            |            |
| no                                                                                                                                                                           | events/h                        |            |            |            |            |
| no                                                                                                                                                                           |                                 |            |            |            |            |

|                                                                                                                                                                                         |                                 |                |  |  |  |
|-----------------------------------------------------------------------------------------------------------------------------------------------------------------------------------------|---------------------------------|----------------|--|--|--|
|                                                                                                                                                                                         |                                 |                |  |  |  |
| no                                                                                                                                                                                      | activity/h                      |                |  |  |  |
| > 2 episodes/h                                                                                                                                                                          | episodes/h                      |                |  |  |  |
| A score is given: 0 = less than 30 events, 1 = 31 to 60 events, 2 = 61 to 100 events, and 3 = more than 100 events                                                                      | score based on events/recording |                |  |  |  |
| 0 = no bruxism [ $\leq$ 39 episodes]; 1 = mild bruxism [40 to 74 episodes]; 2 = moderate bruxism [75 to 124 episodes]; 3 = severe bruxism [ $\geq$ 125 episodes]; and E = error message | score based on events/recording |                |  |  |  |
| no                                                                                                                                                                                      | episodes/h                      | episodes/night |  |  |  |

|                |              |  |  |  |  |
|----------------|--------------|--|--|--|--|
|                |              |  |  |  |  |
| > 4 episodes/h | episodes/h   |  |  |  |  |
| no             | activity/h   |  |  |  |  |
| no             | events/night |  |  |  |  |
| no             | events/night |  |  |  |  |

|    |                                                  |                |  |  |  |
|----|--------------------------------------------------|----------------|--|--|--|
|    |                                                  |                |  |  |  |
| no | EMG events/h                                     |                |  |  |  |
| no | episodes/h                                       | episodes/night |  |  |  |
| no | number of episodes<br>(for reliability analysis) |                |  |  |  |
| no | episodes/h                                       | episodes/night |  |  |  |

|    |              |                       |                   |                            |                 |
|----|--------------|-----------------------|-------------------|----------------------------|-----------------|
|    |              |                       |                   |                            |                 |
| no | events/h     | events/night          |                   |                            |                 |
|    |              |                       |                   |                            |                 |
| no | EMG grinds/h | EMG grinds total<br>n | EMG<br>episodes/h | EMG<br>episodes<br>total n | EMG<br>bursts/h |
|    |              |                       |                   |                            |                 |
| no | events/h     |                       |                   |                            |                 |

|    |                                              |  |  |  |  |
|----|----------------------------------------------|--|--|--|--|
|    |                                              |  |  |  |  |
| no | events/h                                     |  |  |  |  |
| no |                                              |  |  |  |  |
| no | Signal recognition<br>algorithm (SRA) events |  |  |  |  |



|                                                                                                                                             |                                           |                  |          |                |          |
|---------------------------------------------------------------------------------------------------------------------------------------------|-------------------------------------------|------------------|----------|----------------|----------|
|                                                                                                                                             |                                           |                  |          |                |          |
| no                                                                                                                                          | Signal recognition algorithm (SRA) events |                  |          |                |          |
| no                                                                                                                                          | episodes/h                                | episodes total n | grinds/h | grinds total n | bursts/h |
| Based on number of events in a 5h period (0 = less than 30 events, 1 = 31 to 60 events, 2 = 61 to 100 events, and 3 = more than 100 events) | score based on events/recording           |                  |          |                |          |

|    |                         |  |  |  |  |
|----|-------------------------|--|--|--|--|
| no | number of bruxing units |  |  |  |  |
| no |                         |  |  |  |  |
| no |                         |  |  |  |  |
| no | events/h                |  |  |  |  |

|                                                                                                                                                         |                                 |          |  |  |  |
|---------------------------------------------------------------------------------------------------------------------------------------------------------|---------------------------------|----------|--|--|--|
| 5.5 EMG-episode/ h, 32.2 EMG-burst-all/h and 26.4 EMG-burst-5%/h                                                                                        | episodes/h                      | bursts/h |  |  |  |
| 0 = no bruxism, ≤ 39 episodes;<br>1 = mild bruxism, 40-74 episodes;<br>2 = moderate bruxism, 75-124 episodes; and<br>3 = severe bruxism, ≥ 125 episodes | score based on events/recording |          |  |  |  |
| no                                                                                                                                                      | events/recording                |          |  |  |  |
| > 4 episodes/h                                                                                                                                          | episodes/h                      |          |  |  |  |

| no | episodes/h    | phasic sleep-time masticatory muscle activity/h | tonic sleep-time masticatory muscle activity/h | mixed sleep-time masticatory muscle activity/h | sleep-time masticatory muscle activity total number |
|----|---------------|-------------------------------------------------|------------------------------------------------|------------------------------------------------|-----------------------------------------------------|
| no | SB episodes/h | phasic sMMA events/h                            | tonic sMMA events/h                            | mixed sMMA events/h                            | total sMMA events/night                             |
| no |               |                                                 |                                                |                                                |                                                     |
| no | events/h      |                                                 |                                                |                                                |                                                     |

|                                                                                                                                                                                                                                                                |                                        |  |  |  |  |
|----------------------------------------------------------------------------------------------------------------------------------------------------------------------------------------------------------------------------------------------------------------|----------------------------------------|--|--|--|--|
| <p>This device indicates the total number of SB events on a four-grade scale: L, 1, 2, and 3 (less than 30 events, 30–59 events, 60–99 events, and more than 100 events per 4.5 h, respectively).</p>                                                          | <p>score based on events/recording</p> |  |  |  |  |
| <p>Subjects were classified as normal control (NC) when SB scores indicated only 0 or 1 during the 3 nights, or as severe SB for scores 2 or 3. Those subjects whose scores fluctuated from 0 to 3 during the 3 nights were omitted from further analysis.</p> | <p>score based on events/recording</p> |  |  |  |  |
| <p>SB frequency score in four grades (0, 1, 2, and 3)</p>                                                                                                                                                                                                      | <p>score based on events/recording</p> |  |  |  |  |
| <p>no</p>                                                                                                                                                                                                                                                      | <p>episodes/h</p>                      |  |  |  |  |

|                |                   |                       |                     |                      |  |
|----------------|-------------------|-----------------------|---------------------|----------------------|--|
|                |                   |                       |                     |                      |  |
| no             | RMMA episodes/h   | short-burst episode/h | clenching episode/h | other EMG episodes/h |  |
| no             | events/h          | events/night          | bursts/event        |                      |  |
| no             |                   |                       |                     |                      |  |
| > 4 episodes/h | phasic episodes/h | tonic episodes/h      | mixed episodes/h    |                      |  |

|                                                          |                                            |                        |  |  |  |
|----------------------------------------------------------|--------------------------------------------|------------------------|--|--|--|
|                                                          |                                            |                        |  |  |  |
| ≥ 2 episodes/h                                           | events/h                                   | events/night           |  |  |  |
| scores 0-2: nonsevere SB group, score 3: severe SB group | score based on events/recording            |                        |  |  |  |
| no                                                       | number of clenching/grinding episodes/week |                        |  |  |  |
| no                                                       | activity periods/h                         | activity periods/night |  |  |  |

|                                                                                                                                                                                                                                      |                                            |                       |                      |                   |  |
|--------------------------------------------------------------------------------------------------------------------------------------------------------------------------------------------------------------------------------------|--------------------------------------------|-----------------------|----------------------|-------------------|--|
| <p>&gt; 2 episodes/h for moderate<br/>and &gt; 4 episodes/h for intense</p>                                                                                                                                                          | <p>episodes/h</p>                          |                       |                      |                   |  |
| <p>&gt; 2 episodes/h for moderate<br/>and &gt; 4 episodes/h for severe</p>                                                                                                                                                           | <p>episodes/h</p>                          |                       |                      |                   |  |
| <p>Lavigne 1996 criteria</p>                                                                                                                                                                                                         | <p>episodes/h</p>                          | <p>episodes/night</p> | <p>burst/episode</p> | <p>bruxisms/h</p> |  |
| <p>0 = no bruxism (<math>\leq</math> 39 episodes),<br/>1 = mild bruxism (40-74<br/>episodes), 2 = moderate<br/>bruxism (75-124 episodes), 3 =<br/>severe bruxism (<math>\geq</math> 125<br/>episodes), and E = error<br/>message</p> | <p>score based on<br/>events/recording</p> |                       |                      |                   |  |



|    |                                |                |  |  |  |
|----|--------------------------------|----------------|--|--|--|
|    |                                |                |  |  |  |
| no | RMMA episode<br>frequency (Hz) | episodes/night |  |  |  |
| no | events/min                     |                |  |  |  |
| no | mean number of<br>events       |                |  |  |  |

|    |                          |  |  |  |  |
|----|--------------------------|--|--|--|--|
|    |                          |  |  |  |  |
| no | EMG units                |  |  |  |  |
| no | $\mu\text{V}/\text{sec}$ |  |  |  |  |
| no | events/recording         |  |  |  |  |

|                                                                                                                                                                                              |                                 |          |  |  |  |
|----------------------------------------------------------------------------------------------------------------------------------------------------------------------------------------------|---------------------------------|----------|--|--|--|
|                                                                                                                                                                                              |                                 |          |  |  |  |
| no                                                                                                                                                                                           | episodes/h                      |          |  |  |  |
| (SB episodes per minute): 0 = no bruxism (up to 39 episodes), 1 = mild bruxism (40 to 74 episodes), 2 = moderate bruxism (75 to 124 episodes), 3 = severe bruxism ( $\mu \geq 125$ episodes) | score based on events/recording |          |  |  |  |
| $\geq 2$ episodes/h                                                                                                                                                                          | episodes/h                      | bursts/h |  |  |  |

|    |                             |              |               |  |  |
|----|-----------------------------|--------------|---------------|--|--|
|    |                             |              |               |  |  |
| no | rhythmic NMMA<br>episodes/h | EMG bursts/h | burst/episode |  |  |
| no | bursts/h                    |              |               |  |  |
| no | events/h                    |              |               |  |  |

|                                                                                                     |                    |                        |                                                                          |  |  |
|-----------------------------------------------------------------------------------------------------|--------------------|------------------------|--------------------------------------------------------------------------|--|--|
|                                                                                                     |                    |                        |                                                                          |  |  |
| no                                                                                                  | events/recording   |                        |                                                                          |  |  |
| no                                                                                                  | number of episodes |                        |                                                                          |  |  |
| 18 EMG/h or higher in T2 (3 consecutive nights) and 19 EMG/h or higher in T3 (5 consecutive nights) | events/h           | total number of events | coefficient of variation from the multiple night recordings (CV SD/mean) |  |  |

|                       |                  |                |                                            |            |  |
|-----------------------|------------------|----------------|--------------------------------------------|------------|--|
|                       |                  |                |                                            |            |  |
| Lavigne 1996 criteria | episodes/h       | episodes/night | burst/episode                              | bruxisms/h |  |
| > 25 events/h         | events/h         |                |                                            |            |  |
| no                    | events/recording | events/h       | coefficient of variation<br>(CV=SD / mean) |            |  |

|    |                   |                        |                                          |  |  |
|----|-------------------|------------------------|------------------------------------------|--|--|
|    |                   |                        |                                          |  |  |
| no | episodes/h        |                        |                                          |  |  |
| no | clench episodes/h | clench episodes number |                                          |  |  |
| no | events/h          | number of events       | night-to-night variability (CV=SD/mean ) |  |  |

|    |            |                |  |  |  |
|----|------------|----------------|--|--|--|
|    |            |                |  |  |  |
| no | episodes/h | episodes/night |  |  |  |
|    |            |                |  |  |  |
| no | bursts/h   |                |  |  |  |
|    |            |                |  |  |  |
| no | events/h   |                |  |  |  |



| Frequency<br>6 | Duration1                                                                                        | Duration2 | Duration3 | Duration4 | Duration5 | Intensity1                                                      | Intensity2 | Intensity3 |
|----------------|--------------------------------------------------------------------------------------------------|-----------|-----------|-----------|-----------|-----------------------------------------------------------------|------------|------------|
|                |                                                                                                  |           |           |           |           | integrated<br>EMG<br>values/h<br>( $\mu\text{V}\cdot\text{s}$ ) |            |            |
|                |                                                                                                  |           |           |           |           |                                                                 |            |            |
|                |                                                                                                  |           |           |           |           |                                                                 |            |            |
|                | EMG<br>duration/h                                                                                |           |           |           |           | EMG<br>AUC/h                                                    |            |            |
|                | total duration<br>of muscle<br>activity/h,<br>averaged<br>across the 5-<br>night study<br>period |           |           |           |           |                                                                 |            |            |



|  |                    |                             |  |  |  |                                                        |  |  |
|--|--------------------|-----------------------------|--|--|--|--------------------------------------------------------|--|--|
|  |                    |                             |  |  |  |                                                        |  |  |
|  |                    |                             |  |  |  |                                                        |  |  |
|  |                    |                             |  |  |  |                                                        |  |  |
|  |                    |                             |  |  |  |                                                        |  |  |
|  | duration of events | total no secs bruxing/night |  |  |  | intensity of bruxing as a factor of force and duration |  |  |

|  |                      |                            |  |  |  |                             |                                |                                |
|--|----------------------|----------------------------|--|--|--|-----------------------------|--------------------------------|--------------------------------|
|  |                      |                            |  |  |  |                             |                                |                                |
|  |                      |                            |  |  |  |                             |                                |                                |
|  |                      |                            |  |  |  |                             |                                |                                |
|  |                      |                            |  |  |  |                             |                                |                                |
|  | duration of episodes | intervals between episodes |  |  |  | mean amplitudes of episodes | maximum amplitudes of episodes | integral (= muscle work, %MVC) |

|                    |                        |                      |                |  |  |                    |  |  |
|--------------------|------------------------|----------------------|----------------|--|--|--------------------|--|--|
|                    |                        |                      |                |  |  |                    |  |  |
|                    | event duration/h       | event duration/night | event duration |  |  |                    |  |  |
| EMG bursts total n | EMG burst duration     |                      |                |  |  | intensity          |  |  |
|                    | % event duration/night |                      |                |  |  | total EMG activity |  |  |





|  |                                                       |                                              |  |  |  |                                                           |  |  |
|--|-------------------------------------------------------|----------------------------------------------|--|--|--|-----------------------------------------------------------|--|--|
|  |                                                       |                                              |  |  |  |                                                           |  |  |
|  |                                                       |                                              |  |  |  |                                                           |  |  |
|  | cummulative<br>duration of<br>each episode            | cummulati<br>ve<br>duration of<br>episodes/h |  |  |  |                                                           |  |  |
|  | DF for<br>duration of<br>muscle activity<br>threshold |                                              |  |  |  | DF for<br>magnitude<br>of muscle<br>activity<br>threshold |  |  |
|  |                                                       |                                              |  |  |  |                                                           |  |  |



|  |                                              |                                     |  |  |  |                                                                        |                                                               |  |
|--|----------------------------------------------|-------------------------------------|--|--|--|------------------------------------------------------------------------|---------------------------------------------------------------|--|
|  |                                              |                                     |  |  |  |                                                                        |                                                               |  |
|  |                                              |                                     |  |  |  |                                                                        |                                                               |  |
|  |                                              |                                     |  |  |  |                                                                        |                                                               |  |
|  | total MMA<br>duration<br>(sec)/recordin<br>g | total MMA<br>duration<br>(sec)/hour |  |  |  | integrated<br>EMG signal<br>( $\mu\text{V} \times$<br>s)/recordin<br>g | integrated<br>EMG signal<br>( $\mu\text{V} \times$<br>s)/hour |  |
|  |                                              |                                     |  |  |  |                                                                        |                                                               |  |

|  |                                               |                                            |                                        |                   |                |                                                       |                                                       |  |
|--|-----------------------------------------------|--------------------------------------------|----------------------------------------|-------------------|----------------|-------------------------------------------------------|-------------------------------------------------------|--|
|  |                                               |                                            |                                        |                   |                |                                                       |                                                       |  |
|  |                                               |                                            |                                        |                   |                |                                                       |                                                       |  |
|  |                                               |                                            |                                        |                   |                |                                                       |                                                       |  |
|  | coefficient of variation of interval duration | coefficient of variation of burst duration | coefficient of variation of cycle time | interval duration | burst duration | n-IEMG (integral values normalized by individual MVC) | n-RMS (root mean square normalized by individual MVC) |  |
|  | % event duration/night                        |                                            |                                        |                   |                | total EMG activity                                    |                                                       |  |

|  |                     |  |  |  |  |  |  |  |
|--|---------------------|--|--|--|--|--|--|--|
|  |                     |  |  |  |  |  |  |  |
|  |                     |  |  |  |  |  |  |  |
|  |                     |  |  |  |  |  |  |  |
|  |                     |  |  |  |  |  |  |  |
|  | episode<br>duration |  |  |  |  |  |  |  |

|  |                |  |  |  |  |                                                                                                  |  |  |
|--|----------------|--|--|--|--|--------------------------------------------------------------------------------------------------|--|--|
|  |                |  |  |  |  |                                                                                                  |  |  |
|  |                |  |  |  |  |                                                                                                  |  |  |
|  | event duration |  |  |  |  |                                                                                                  |  |  |
|  |                |  |  |  |  | cumulative<br>EMG<br>activity<br>( $\mu$ V.s)<br>divided by<br>the<br>duration of<br>sleep (min) |  |  |
|  |                |  |  |  |  |                                                                                                  |  |  |

|  |                                 |  |  |  |  |                              |                             |                            |
|--|---------------------------------|--|--|--|--|------------------------------|-----------------------------|----------------------------|
|  |                                 |  |  |  |  |                              |                             |                            |
|  |                                 |  |  |  |  |                              |                             |                            |
|  |                                 |  |  |  |  |                              |                             |                            |
|  |                                 |  |  |  |  |                              |                             |                            |
|  | activity<br>periods<br>duration |  |  |  |  | mean<br>amplitudes<br>(%MVC) | max<br>amplitudes<br>(%MVC) | time<br>integral<br>(%MVC) |



|  |                                     |  |  |  |  |  |  |  |
|--|-------------------------------------|--|--|--|--|--|--|--|
|  |                                     |  |  |  |  |  |  |  |
|  | pooled RMMA<br>episodes<br>duration |  |  |  |  |  |  |  |
|  |                                     |  |  |  |  |  |  |  |
|  |                                     |  |  |  |  |  |  |  |
|  | mean duration<br>of events          |  |  |  |  |  |  |  |





|  |                         |                            |  |  |  |           |  |  |
|--|-------------------------|----------------------------|--|--|--|-----------|--|--|
|  |                         |                            |  |  |  |           |  |  |
|  | total bruxism<br>time/h | bruxism<br>lasting<br>time |  |  |  |           |  |  |
|  |                         |                            |  |  |  |           |  |  |
|  |                         |                            |  |  |  |           |  |  |
|  | burst duration          |                            |  |  |  | intensity |  |  |



|  |                                       |  |  |  |  |                                           |  |  |
|--|---------------------------------------|--|--|--|--|-------------------------------------------|--|--|
|  |                                       |  |  |  |  |                                           |  |  |
|  |                                       |  |  |  |  |                                           |  |  |
|  | duration (not<br>futher<br>specified) |  |  |  |  | severity<br>(not<br>further<br>specified) |  |  |
|  |                                       |  |  |  |  |                                           |  |  |



|  |                                                      |                                                                                                |  |  |  |                       |  |  |
|--|------------------------------------------------------|------------------------------------------------------------------------------------------------|--|--|--|-----------------------|--|--|
|  |                                                      |                                                                                                |  |  |  |                       |  |  |
|  | bruxism time index (% time bruxing/total sleep time) |                                                                                                |  |  |  |                       |  |  |
|  | mean clench duration                                 | clench-related temporalis duty factor (sum of clench episode durations / total recording time) |  |  |  | mean clench bte-force |  |  |
|  |                                                      |                                                                                                |  |  |  |                       |  |  |

|  |  |  |  |  |  |                                                         |  |  |
|--|--|--|--|--|--|---------------------------------------------------------|--|--|
|  |  |  |  |  |  |                                                         |  |  |
|  |  |  |  |  |  |                                                         |  |  |
|  |  |  |  |  |  | intensity of<br>the EMG<br>(area<br>under EMG<br>curve) |  |  |



|  |
|--|
|  |
|  |
|  |
|  |
|  |



|  |
|--|
|  |
|  |
|  |
|  |

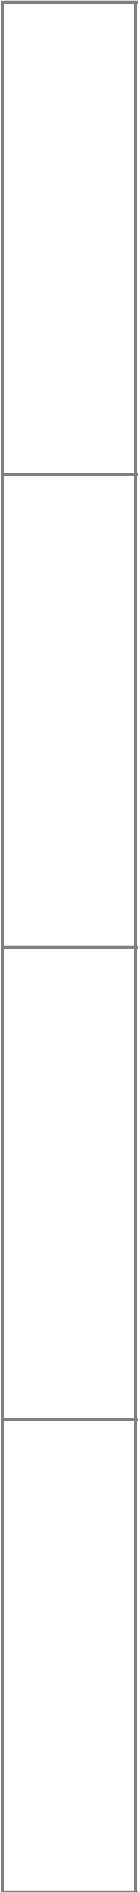

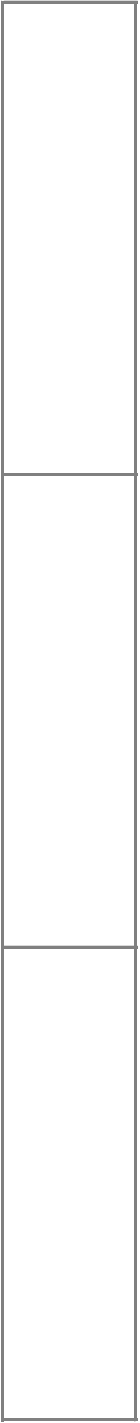

common  
mode  
rejection  
ratio of  
100 dB

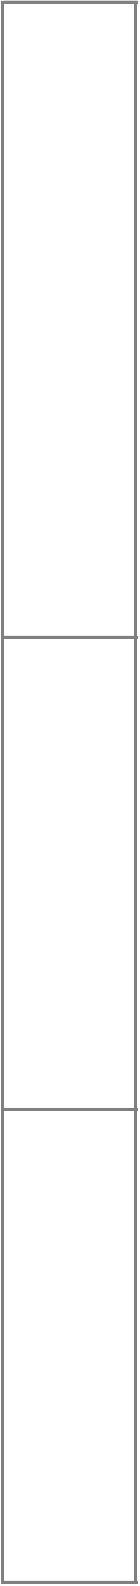

|                                       |
|---------------------------------------|
|                                       |
| common mode rejection ratio of 100 dB |
|                                       |
|                                       |

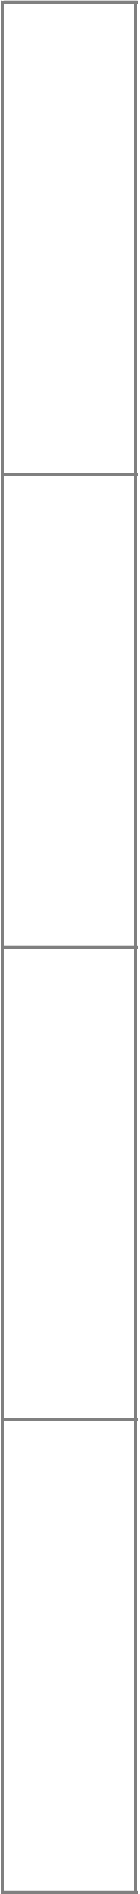







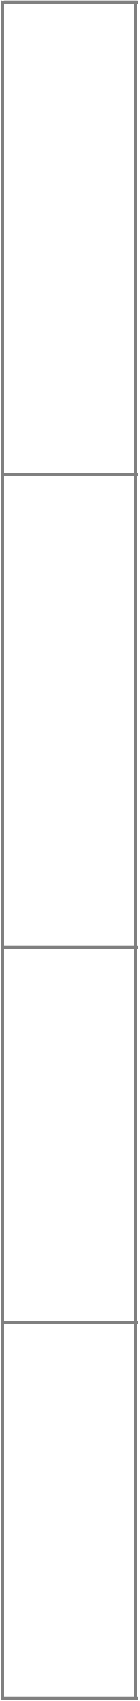

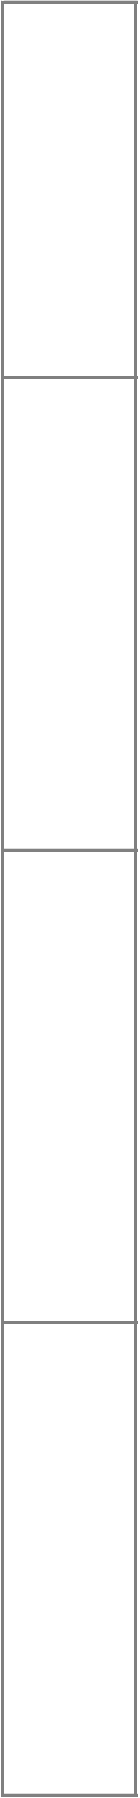



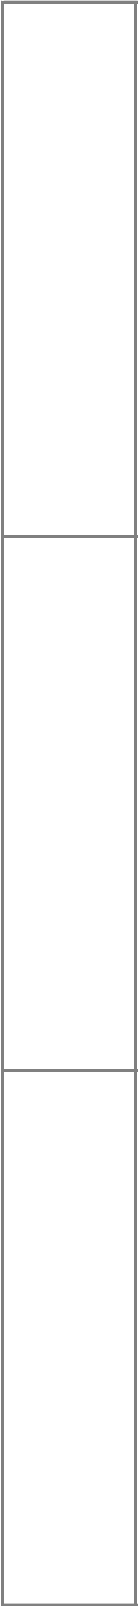













common  
mode  
rejection  
ratio of  
100 dB

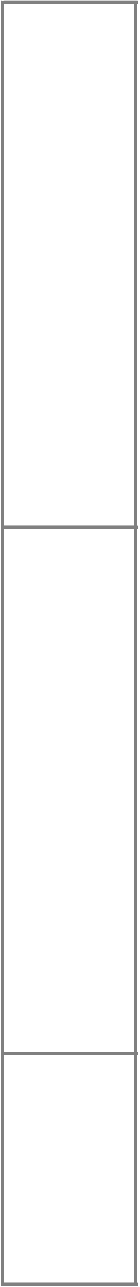

Supplement: JOOR-48-846-s001.pdf [file JOOR-48-846-s001.pdf]
